1 **Title:** *Sorghum bicolor* cultivars have divergent and dynamic gene regulatory networks that  
2 control the temporal expression of genes in stem tissue

3

4 **Authors:** Madara Hetti Arachchilage<sup>1</sup>, John E. Mullet<sup>2</sup>, and Amy Marshall-Colon\*<sup>1,3</sup>

5

6 <sup>1</sup>Center for Advanced Bioenergy and Bioproducts Innovation BRC, University of Illinois  
7 Urbana-Champaign, Urbana, IL, USA 61801

8 <sup>2</sup>Department of Biochemistry and Biophysics, Texas A&M University, College Station, TX,  
9 77843 USA

10 <sup>3</sup>Department of Plant Biology, University of Illinois Urbana-Champaign, 265 Morrill Hall, MC-  
11 116, 505 South Goodwin Ave., Urbana, IL 61801, USA

12

13 \*For correspondence (email: [amymc@illinois.edu](mailto:amymc@illinois.edu))

14

15 **Running title:** Temporal and spatial gene networks of sorghum stems

16

17 **Keywords:** Stem-specific genes, *BTx623*, *Sweet Della*, *Sorghum bicolor*, Tissue-specific gene  
18 regulatory network, Spatial-temporal gene regulation, Cis-regulatory elements, Single nucleotide  
19 variants, Structural variants

20

21 **Abstract:** The genetic engineering of value-added traits such as the accumulation of bioproducts  
22 in high biomass C4 grass stems is one promising strategy to make plant-derived biofuels more  
23 economical for industrial use. A first step toward achieving this goal is to identify stem-specific  
24 promoters that can drive the expression of genes of interest with good temporal and spatial  
25 specificity. However, a comprehensive characterization of the spatial-temporal regulatory  
26 elements of stem tissue-specific promoters for C4 grasses has not been reported. Therefore, we  
27 performed an *in-silico* analysis on *Sorghum bicolor* cv *BTx623* transcriptomes from multiple  
28 tissues over development to identify stem-expressed genes. The analysis identified 10 genes that  
29 are “Always-On-Stem-Specific,” 59 genes that are “Temporally-Stem-Specific during early  
30 development,” and 21 genes that are “Temporally-Stem-Specific during late development.”  
31 Promoter analysis revealed common and/or unique cis-regulatory elements in promoters of genes

32 within each of the three categories. Subsequent gene regulatory network (GRN) analysis revealed  
33 that different transcriptional regulatory programs are responsible for the temporal activation of the  
34 stem-expressed genes. The analysis of temporal stem GRNs between sweet (*cv Della*) and grain  
35 (*cv BTx623*) sorghum varieties revealed genetic variation that could influence the regulatory  
36 landscape. This study provides new insights about sorghum stem biology, and information for  
37 future genetic engineering efforts to fine-tune the spatial-temporal expression of transgenes in C4  
38 grass stems.

39

## 40 **Introduction**

41 High biomass grasses, such as sorghum (*Sorghum bicolor*), miscanthus (*Miscanthus x*  
42 *giganteus*), switchgrass (*Panicum virgatum*), and sugarcane (*Saccharum sp.*), offer an abundant  
43 and renewable source of biomass for biofuels production (McLaughlin and Kszos, 2005; Rooney  
44 *et al.*, 2007; Karp and Shield, 2008; Murray *et al.*, 2008; Waclawovsky *et al.*, 2010a; Byrt, Grof  
45 and Furbank, 2011; Sage and Zhu, 2011; Feltus and Vandenbrink, 2012; Olson *et al.*, 2012; Mullet  
46 *et al.*, 2014; Mathur *et al.*, 2017) providing a sustainable alternative to conventional fossil fuels  
47 (Demirbas, 2007; Demirbas and Demirbas, 2010; Kumar, Long and Singh, 2018; Kumar, 2020).  
48 Grasses with C4 photosynthesis can produce high biomass in marginal lands with low water and  
49 nitrogen inputs, leading to energy conservation (McLaughlin *et al.*, 2002; Heaton, Dohlemn and  
50 Long, 2008; Varvel *et al.*, 2008). However, the cost associated with production of fuels and other  
51 bioproducts from plant biomass is relatively high, which has been a major constraint on the  
52 widespread adoption of grasses as sources of feedstock to produce biofuels or bioproducts (Hill *et*  
53 *al.*, 2006; Kumar, Long and Singh, 2018). Previous work showed that C4 grasses can be genetically  
54 engineered for increased fatty acid production, resulting in biomass with high oil content (Huang,  
55 Long and Singh, 2015; Huang *et al.*, 2016; Wang, 2016; Zale *et al.*, 2016; Beechey-Gradwell *et*  
56 *al.*, 2020; Mitchell *et al.*, 2020; Parajuli *et al.*, 2020), which increases their value as biofuels.  
57 Genetically engineering high-biomass grasses to accumulate valuable bioproducts that require  
58 minimal processing post-harvest is a desirable way forward, but has many challenges.

59 Seeds are the primary site of lipid synthesis and storage in plants (Harwood *et al.*, 1971;  
60 Dyer and Mullen, 2005; Lung and Weselake, 2006; Graham, 2008; Koçar and Civaş, 2013; Li *et*  
61 *al.*, 2016; Baud, 2018) in the form of triacylglycerols (TAGs) which have twice the energy density  
62 of carbohydrates and can be easily converted to other biofuel products. While oil-accumulating

63 seeds have been a source of lipids for the biofuel industry, use of oil seeds or fruits for biofuels  
64 could negatively impact food supplies and prices. Therefore, genetic engineering of vegetative  
65 tissues to accumulate higher triacylglycerol (TAG) levels has drawn attention (Durrett, Benning  
66 and Ohlrogge, 2008; Qazi, Paranjpe and Bhargava, 2012; Napier *et al.*, 2014a; Kumar, 2020).  
67 Since C4 grasses can be grown on marginal lands not suitable for most food crops, the high  
68 biomass producing vegetative tissues of sorghum, miscanthus, and sugarcane are desirable targets  
69 for engineering efforts aimed at producing and/or storing lipids (Carlsson *et al.*, 2011; Sanjaya *et*  
70 *al.*, 2011; Weselake, 2016a; Lima *et al.*, 2017). For example, stem tissues engineered to divert  
71 energy from nonstructural carbohydrates into the lipid biosynthesis pathway through strategies  
72 such as increasing the supply of FAs, increasing TAG assembly activities, and blocking TAG  
73 breakdown pathways have resulted in higher amounts of TAGs accumulating in vegetative tissues  
74 (Papini-Terzi *et al.*, 2009; Waclawovsky *et al.*, 2010b; Sanjaya *et al.*, 2011; Qazi *et al.*, 2014;  
75 Sekhon *et al.*, 2016). Other proof-of-concept studies for increasing TAGs in vegetative tissues  
76 have been performed in *Arabidopsis thaliana*, *Brachypodium distachyon*, *Nicotiana benthamiana*,  
77 *Nicotiana tabacum*, sugarcane (*Saccharum* spp.), and *Sorghum bicolor* (Thelen and Ohlrogge,  
78 2002; Fan, Yan and Xu, 2013; Vanhercke *et al.*, 2013, 2019; Yang *et al.*, 2015; Zale *et al.*, 2016;  
79 Mitchell *et al.*, 2020; Parajuli *et al.*, 2020; Xu *et al.*, 2020). For example, in engineered sugarcane,  
80 TAGs accumulated to an average of 8.0% of the dry weight of leaves and 4.3% of the dry  
81 weight of stems (Huang, Long and Singh, 2015; Zale *et al.*, 2016; Parajuli *et al.*, 2020). Another  
82 study in tobacco achieved TAGs accumulation up to 19% of the dry weight of the total biomass  
83 production by over-expressing the genes encoding WRINKLED1, DGAT, and oleosins  
84 (Vanhercke *et al.*, 2014; Zale *et al.*, 2016). However, many of these engineering efforts to increase  
85 TAG accumulation in immature vegetative tissues have resulted in negative impacts on plant  
86 growth as observed in sorghum, potato, tobacco, and *Arabidopsis* (Slocombe *et al.*, 2009; Feltus  
87 and Vandenbrink, 2012; Kelly *et al.*, 2013; Vanhercke *et al.*, 2014, 2019; Hofvander *et al.*, 2016;  
88 Liu *et al.*, 2017; Ramšak *et al.*, 2018; Xiaoyu Xu *et al.*, 2019; Xu *et al.*, 2020; Mitchell *et al.*,  
89 2020). One hypothesis is that driving lipid accumulation under the control of tissue- and/or  
90 developmental-stage specific promoters, specifically those active during late development (Moyle  
91 and Birch, 2013; Mudge *et al.*, 2013), will have less of an impact on photosynthetic efficiencies  
92 and plant growth than constitutive overexpression of genes of interest.

93 Sink–source dynamics within the plant direct how much, where, and when carbohydrates  
94 are allocated, and determine final biomass of vegetative plant organs and seed. Knowledge of the  
95 spatial and temporal heterogeneity of carbon sinks among tissues and cell types in vegetative  
96 tissues during development could enable more informed genetic engineering (Schnyder, 1993;  
97 Hoffmann-Thoma *et al.*, 1996; Wang *et al.*, 2007; Sanjaya *et al.*, 2011; Slewinski, 2012; da Costa  
98 *et al.*, 2014; Sekhon *et al.*, 2016; Hennem *et al.*, 2020). For example, previous studies reported that  
99 sorghum, sugarcane, and wheat store excess carbohydrates in the form of soluble sugars in stem  
100 pith parenchyma, in close proximity to vascular bundles located within internode, and these stem  
101 carbohydrate reserves can be remobilized and partitioned to the developing grain during the  
102 reproductive phase (Hoffmann-Thoma *et al.*, 1996; Douglas *et al.*, 2002; Walsh, Sky and Brown,  
103 2005; Ruuska *et al.*, 2006; Tarpley and Vietor, 2007; Rae *et al.*, 2009; Qazi, Paranjpe and  
104 Bhargava, 2012; Sekhon *et al.*, 2016; Kebrom, McKinley and Mullet, 2017; McKinley *et al.*,  
105 2018). In such cases, tissue and developmental-stage specific promoters could be leveraged to  
106 divert the nonstructural carbohydrates to tissues engineered for elevated TAG production and  
107 accumulation, potentially avoiding the previously observed inhibition of photosynthesis and  
108 growth at early developmental stages. Many tissue-specific promoters have been successfully  
109 characterized and applied to targeted genetic engineering of maize, rice, soybean, tomato, potato,  
110 and tobacco (Deikman, Kline and Fischer, 1992; Trindade *et al.*, 2003; Cao *et al.*, 2007; Li *et al.*,  
111 2013, 2019; Molla *et al.*, 2013; Dutt *et al.*, 2014; Napier *et al.*, 2014b, 2014a; Chen *et al.*, 2015;  
112 Wang *et al.*, 2017). Thus, increasing oil accumulation in stems of biofuel crops without impacting  
113 plant growth will require manipulation of developmental-stage specific and stem-specific  
114 promoters. Potential strategies include: a) converting sucrose to lipid in specific cells/tissues at  
115 stages when non-structural carbohydrates are highly abundant, and b) increasing stem and other  
116 vegetative tissue carbon sink strength, and sink storage capacity at late developmental stages  
117 (Slocombe *et al.*, 2009; Zhang *et al.*, 2010; P. Joshi and Nookaraju, 2012; Kim *et al.*, 2015;  
118 Weselake, 2016b; Xu and Shanklin, 2016; Shih, 2018).

119 Cis -regulatory elements in promoters upstream of a gene provide specific binding sites for  
120 their corresponding transcription factors (TFs), which regulate the transcription of gene  
121 expression. Studies in Arabidopsis and a few crop species have uncovered cis-regulatory elements  
122 that govern stem vascular tissue specific expression patterns, including phloem-specific, xylem-  
123 specific, and companion cell-specific promoter elements (**Table S1**) (Dutt *et al.*, 2014). However,

124 a comprehensive characterization of the spatial-temporal regulatory elements of stem specific  
125 promoters for C4 grasses has not been reported but is necessary to understand the regulation of  
126 stem-expressed genes. Therefore, we performed an *in-silico* genome-wide analysis to identify  
127 stem-specific genes in Sorghum and the regulatory network that drives their spatial-temporal  
128 expression dynamics. We also examined the conservation/divergence of TF regulators of stem-  
129 specific genes between the two sorghum cultivars, sweet sorghum (*Sorghum bicolor cv Della*) and  
130 grain sorghum (*Sorghum bicolor cv BTx623*).

131

## 132 **Results and Discussion**

133 We analyzed a gene expression atlas of sorghum tissues (McCormick *et al.*, 2018a) to identify  
134 genes specifically expressed in stem tissue over development. For this purpose, we used 38  
135 expression profiles of five different *Sorghum bicolor (cv BTx623)* organs (stem, leaves, roots,  
136 peduncle, panicle, seeds) across five developmental stages (juvenile, vegetative, floral initiation,  
137 anthesis, grain maturity) to perform a tissue specificity analysis. We explored the gene regulatory  
138 networks (GRNs) for stem-expressed genes in an attempt to identify regulatory promoter elements  
139 that may contribute to the tissue-specific expression of these genes. The identification of such  
140 elements may help to uncover a stem-specific promoter that could be used as a molecular tool for  
141 the temporal and spatial expression of genes of interest that are not normally expressed in stem  
142 tissue. We performed further investigation to identify genetic variations in stem-preferred genes  
143 and their regulators, which cause large changes in the stem-specific GRNs between sweet sorghum  
144 (*Sorghum bicolor cv Della*) and grain sorghum (*Sorghum bicolor cv BTx623*).

### 145 **Tau index identifies stem-expressed genes over development**

146 Several methods have been developed to determine tissue-specific gene expression (Huminiacki,  
147 Lloyd and Wolfe, 2003; Schug *et al.*, 2005; Yanai *et al.*, 2005; Smith *et al.*, 2006; Yu *et al.*, 2006;  
148 Xiao *et al.*, 2010; Julien *et al.*, 2012; Uhlen *et al.*, 2015; O'Hagan *et al.*, 2018). A recent benchmark  
149 study compared nine algorithms to determine tissue specificity and identified that the Tau ( $\tau$ ) index  
150 was the most robust analysis (Kryuchkova-Mostacci and Robinson-Rechavi, 2016). According to  
151 the tissue-specificity benchmark study,  $\tau$  value analysis identified the most known tissue-specific

152 genes in the human genome; including genes not detected by other algorithms, and avoided bias  
153 toward classifying most genes as “housekeeping.”

154 In this study, we used  $\tau$  index to estimate the tissue-specificity of expressed genes at a given  
155 developmental stage. A summary of the number of tissue-specific genes found for each tissue type  
156 at each development stage is listed in **Table S2**. A small portion of genes exhibited tissue-specific  
157 expression at each of the developmental stages ( $\tau = 1$ ) in stem, root, leaf, peduncle, panicle and  
158 seed tissues. There were fewer tissue-specific genes in stem tissue compared to leaf, root, and  
159 reproductive tissues. We observed a higher number of stem-specific genes during early stages  
160 compared to late stages (157, 133, 21, 21 and 44 stem-specific genes at juvenile, vegetative, floral,  
161 anthesis, and grain stages, respectively). Of the stem-specific genes identified at each  
162 developmental stage, some genes were always expressed in the stem throughout development,  
163 while some genes were transiently stem-specific over development. In this study, we classified  
164 three groups of stem-expressed genes: AOSS (Always-On-Stem-Specific), TSS-Early  
165 (Temporally-Stem-Specific during early development), and TSS-Late (Temporally-Stem-Specific  
166 during late development), in which there were 10 AOSS, 59 TSS-Early, and 21 TSS-Late genes  
167 (**Table S3**).

### 168 **Expression patterns of AOSS, TSS-Early, TSS-Late genes and their functional** 169 **characterization**

170 There were 10 genes in the AOSS group that had high stem-specificity (no significant expression  
171 at threshold of 5 TPM in non-stem tissues). Specifically, Sobic.006G024800 (an  
172 Andropogoneae family gene), Sobic.006G026300 (a Poaceae family gene) and  
173 Sobic.003G272000 (a Poales family gene) had high tissue specificity ( $\tau = 1$ ) and high expression  
174 (expression > 100 TPM) across the five developmental time points (**Figure 2**, **Figure S1**). The  
175 high stem-specificity value for these genes in *Sorghum cv BTx623* make them interesting  
176 candidates for further investigation. Other genes in the AOSS group had high stem-specificity at  
177 early developmental stages; however, during the later stages these genes were expressed at similar  
178 levels among vegetative stems, the developing peduncle, and panicles which also contain stem  
179 tissue (rachis, pedicles) (**Figure 2**). These genes include Sobic.001G106200 (KNAT1; TALE TF  
180 family gene with KNOX DNA binding domain), Sobic.001G106000 (KNAT1; TALE TF),  
181 Sobic.010G194600 (HSP90-like ATPase family protein), Sobic.006G147500 (light sensitive



182 hypocotyls 6, LSH6), Sobic.002G419500 (HAD superfamily, subfamily IIIB acid phosphatase),  
183 Sobic.003G007200 (TIP4; tonoplast intrinsic protein), Sobic.007G008700 (ARM repeat  
184 superfamily protein, Poaceae specific family). KNAT1 is involved in meristem maintenance  
185 promoting cell proliferation and inhibiting differentiation and was previously shown to move  
186 between adjacent cells via intercellular pores formed by plasmodesmata in Arabidopsis (Kehr &  
187 Kragler, 2018). In Arabidopsis, *knat1* mutant plants had reduced formation of xylem fibers  
188 (Helizon *et al.*, 2014a).

189 There were 59 TSSE genes that are “stem-preferred” rather than stem-specific, which are highly  
190 expressed in the stem during early development, but have no, low, or moderate expression in non-  
191 stem tissues (leaf, root, seed) during late development. The TSSE genes that have high stem  
192 specificity ( $\tau = 1$ ) during vegetative and juvenile stages and are not expressed during later stages  
193 (**Table S3**), including Sobic.001G239000, Sobic.005G018900 (PLC2; Phospholipase C2),  
194 Sobic.005G051600 (DUF247), Sobic.005G188500 (DUF94), Sobic.006G017500 (Disease  
195 resistance protein family/CC-NBS-LRR class), and Sobic.007G099966 (Andropogoneae specific  
196 family). Other TSSE genes also have high stem specificity ( $\tau = 1$ ) during vegetative and juvenile  
197 stages but have low to moderate expression in non-stem tissues during late development, thus their  
198 tissue specificity is more temporal. Many of the genes in this latter group have known stem-related  
199 functions related to early regulation of vascular tissue development and maintenance as listed in  
200 **Table 2**. Two of these genes, YAB1 and CLAVATA3, are involved in CLAVATA (CLV)-  
201 WUSCHEL (WUS) pathway to regulate stem cell maintenance in shoot and floral meristems  
202 (Caño-Delgado, Lee and Demura, 2010; Ruonala, Ko and Helariutta, 2017). CLV3 is expressed  
203 in the central domain of SAM and influences the relative positioning of the organ primordia by  
204 acting together with CLV1 and WUS (Ottoline Leyser and Furner, 1992), while YAB1 defines the  
205 primordia domain of the SAM periphery and promotes robust partitioning of the SAM by non-  
206 autonomously communicating with the meristem to regulate the expression of CLV3 and WUS.  
207 This coordination is essential for organized growth of the SAM (Goldshmidt *et al.*, 2008a; Stähle  
208 *et al.*, 2009a).

209 There were 21 TSSL genes that, like the TSSE genes, are stem-preferred temporally during late  
210 development but have no, low, or moderate expression in non-stem tissues (leaf, root) during early  
211 development (**Table S3**). Two of these TSSL genes that have high stem specificity during floral,

212 anthesis, and grain maturity stages, but are expressed in non-stem tissues during early  
213 development, include Sobic.002G299200 (AGO1) and Sobic.006G166300 (WRKY12). AGO1 is  
214 required for the function of most miRNAs, including miR165/166, to repress the HD-ZIP TFs such  
215 as PHB, PHV, REV related to the developmental regulators required for SAM establishment and  
216 vascular development in *Arabidopsis* (Kidner and Martienssen, 2005; Mallory *et al.*, 2009; Zhang  
217 and Zhang, 2012). WRKY12 was previously shown to negatively regulate the expression of NST2,  
218 which acts as a master regulator in switching on and off secondary cell wall biosynthesis and  
219 represses cell wall biosynthetic genes in pith cells in *Arabidopsis*, *Medicago sativa L.* (Sanchez,  
220 Nehlin and Greb, 2012; Gallego-Giraldo *et al.*, 2016; Yang and Wang, 2016; Yang *et al.*, 2016).  
221 Genes involved in secondary cell wall formation were down-regulated in Della post anthesis,  
222 possibly mediates in part through the action of WRKY12 (McKinley *et al.*, 2016).

223 To elucidate the enriched functional categories of the identified stem-preferred genes, GO term  
224 analysis was performed using PlantTFDB for AOSS, TSSE and TSSL gene sets separately (**Figure**  
225 **3**). AOSS and TSSE genes were enriched in biological process-related GO terms for biological  
226 regulation and regulation of transcription, while TSSL genes were enriched for plasma membrane-  
227 related cellular component GO terms. Based on functional annotations, there were 10 stem-  
228 preferred TFs from TALE, HD-ZIP, B3, YABBY, WRKY, AP2, bHLH protein families (**Table**  
229 **S3**). Also, there are 15 Andropogoneae family-specific stem-preferred genes (homologs are only  
230 found in *Sorghum bicolor*, *Saccharum spontaneum*, *Miscanthus sinensis*, and *Zea mays*), in which  
231 10 of them are “orphan” genes without detectable homologues in other lineages for any previously  
232 annotated gene among eukaryotes, and are unique to a species and/or phylogenetic clade. Previous  
233 reports have shown that orphan genes generally have lower expression levels but higher tissue-  
234 specific expression compared to phylogenetically conserved genes (Levine *et al.*, 2006; Donoghue  
235 *et al.*, 2011; Wu, Irwin and Zhang, 2011). Several hypotheses have been proposed to explain the  
236 regulation of these younger genes that lead to tissue-specific and/or stage-specific expression,  
237 including transposon insertion upstream of the transcription start-site, shared regulatory elements  
238 with older genes (possibly by gene overlap), association with a bidirectional promoter, or by being  
239 located within an intron (Maksakova and Mager, 2005; Toll-Riera *et al.*, 2008; Arendsee, Li and  
240 Wurtele, 2014; Sundaram and Wysocka, 2020). We explored the cis-regulatory elements in the  
241 putative promoter regions of these genes below.



## 242 **Cis-regulatory element enrichment of AOSS, TSS-Early, TSS-Late stem-preferred genes**

243 The three groups of stem genes (AOSS, TSSE, TSSL) were further explored in an attempt to  
244 uncover common and unique CREs that regulate these groups. Many CREs were common among  
245 promoters of genes of interest (GOI), including the orphan genes, across the three categories of  
246 stem-expressed genes (AOSS, TSS-Early, TSS-Late) (**Figure 4**), indicating that these genes are  
247 co-regulated by TFs that bind to the enriched CREs. These common CREs included binding sites  
248 for TF known to play roles in stem-specific functions such as bZIP, AT-Hook, HD-ZIP, GATA,  
249 MYB, SBP, TCP, WOX, which are previously reported to be present in vascular-specific genes  
250 (**Table S1**) (YH and SR, 2003; Ruiz-Medrano *et al.*, 2011; Le Hir and Bellini, 2013; Zhang *et al.*,  
251 2014). Interestingly, the AP2 CRE was uniquely enriched in the AOSS group of genes, while the  
252 CPP CRE was strongly enriched in the TSSL group of genes compared to the AOSS and TSSE  
253 groups (**Figure 4**). This result suggests that TFs binding to the AP2 and CPP CREs might have an  
254 important role in the specific regulation of genes in the AOSS and TSSL groups.

## 255 **Gene regulatory networks of AOSS, TSS-Early, TSS-Late stem-preferred genes**

256 Differential gene expression over development is controlled by temporal changes in TF binding to  
257 promoter elements. It is not only the timing of a TF's expression, but also its temporal promoter  
258 occupancy that determines time evolved gene expression (Para *et al.*, 2014). However, extensive  
259 patterns of TF occupancy in developmental contexts are not known for sorghum (i.e. ChIP-Seq or  
260 DAP-seq). Therefore, elucidating the dynamic properties of cis-regulatory networks from  
261 available spatial-temporal datasets is useful in understanding how dynamic expression states arise.  
262 To explore which TFs regulate the expression of stem-specific genes, and examine whether stem-  
263 expressed genes are differentially regulated over time, gene regulatory networks (GRNs) were  
264 constructed for each group of stem-expressed genes at each developmental stage. GRNs were  
265 constructed by layering TF binding predictions onto gene co-expression networks. We generated  
266 15-temporal stem-preferred gene regulatory networks (5 temporal GRNs for AOSS, TSS-Early,  
267 TSS-Late). See **Data S1** for list of stem-preferred genes and TFs and unique directed TF–target  
268 gene interactions for each of 15 GRNs.

269 GRN analysis of AOSS, TSS-Early, TSS-Late genes along with their co-expressed TFs revealed  
270 that the connectivity of each network has a positive correlation with the corresponding out-node  
271 degree, and that the out-node degree 'x' in each of the networks follows a power-law distribution

272  $y=ax^b$  with an average exponent  $b$  of  $0.182\pm 0.064$ ,  $0.169\pm 0.064$ ,  $0.23\pm 0.07$  for AOSS, TSS-  
273 Early, TSS-Late, respectively (**Table 3**). The connectivity of each network has a positive  
274 correlation with the corresponding out-node degree (AOSS:  $0.661\pm 0.205$ , TSSE:  $0.653\pm 0.127$ ,  
275 TSSL:  $0.629\pm 0.229$ ). This suggests that the GRNs have the properties of robust biological  
276 networks, which tend to contain scale-free properties such as having few nodes with a very large  
277 number of regulatory edges, or “hubs.” These hub genes are absent in random networks, for which  
278 the degree of all nodes is close to the average degree according to network theory (Cohen, Havlin  
279 and ben-Avraham, 2002; Barabási and Oltvai, 2004). Thus, the hubs in our GRNs potentially co-  
280 regulate many of the stem-expressed genes (**Figure 5**). In the stem GRNs, each TF is associated  
281 with an average of 4 genes during the early stages and 15 genes during the late stages (**Table 3**).  
282 Similarly, multiple TFs can regulate the expression of a single gene, and in the stem GRNs, each  
283 target gene is associated with an average of five regulatory TFs during the early stages compared  
284 to 18 regulatory TFs in the late stages. These results demonstrate that stem-expressed genes  
285 become increasingly co-regulated over development.

286 **TF Hubs enriched for known stem genes:** We evaluated the hubbiness of the TFs in our GRNs  
287 to identify TFs that exert a large amount of control over the entire network. Hubs are defined here  
288 as highly connected TF genes (top 25% h-index) (See **Table S4** for list of TF hubs in each  
289 network). The most frequent TF families present in the networks are bHLH, bZIP, ERF, C2H2,  
290 G2-like, GATA, HD-ZIP, NAC, MYB, MYB-related, TALE, Trihelix, and WRKY. TFs  
291 previously reported as important regulatory genes in stem tissue are present in the networks,  
292 including known stem TF hubs such as PHB, ATHB15, APL, VND7, KNAT1, MYB42, and  
293 MYB52 (McConnell *et al.*, 2001; Ye, 2002; Emery *et al.*, 2003; Kubo *et al.*, 2005; Floyd, Zalewski  
294 and Bowman, 2006; Hoon Jung and Mo Park, 2007; Zhong *et al.*, 2008; Zhou, Sebastian and Lee,  
295 2011; De Rybel *et al.*, 2016; Hennet *et al.*, 2020). Radial patterning of the vascular bundles is  
296 established by TF hubs from class III HD-ZIPs, PHB, ATHB15 (McConnell *et al.*, 2001; Emery  
297 *et al.*, 2003; Floyd, Zalewski and Bowman, 2006). NACs are reported to be TF hubs that can  
298 induce xylem cell differentiation (Kubo *et al.*, 2005; Zhong *et al.*, 2008). For example, VND7  
299 (NAC TF Family) initiates metaxylem vessel differentiation and induces hierarchical gene  
300 expression network by inducing other TFs such as MYBs, which in turn function as secondary and  
301 tertiary regulators of genes related to secondary cell wall thickening during xylem cell

302 differentiation (Ye, 2002; Hoon Jung and Mo Park, 2007; Zhou, Sebastian and Lee, 2011; De  
303 Rybel *et al.*, 2016).

304 Next, we compared hubbiness of TFs over development to identify significant TF genes that  
305 change their hub property status relevant to early and late developmental phases. Our expectation  
306 was there might be different set of critical TFs that drive stem-specific gene expression during  
307 early and late development. There were 22 and 22 TFs that acted as early TF hubs (act as a TF hub  
308 only during early stages) for AOSS and TSSE genes, respectively. Likewise, there were 19 and 21  
309 late TF hubs (act as a TF hub only during late stages) for AOSS and TSSL genes, respectively  
310 (**Table S5**). We examined whether any of these early and late TF hubs are unique to AOSS vs.  
311 TSSE/TSSL genes. However, the results showed all early and late TF hubs are critical TF hubs for  
312 AOSS, TSSE, TSSL genes during early and late stages, respectively. Likewise, genes that remain  
313 a functionally conserved TF hub in all GRNs during early and late phases also tend to be TF hubs  
314 for all AOSS, TSSE, TSSL GRNs. This could mean stem-specific and transiently stem-specific  
315 genes are likely co-regulated by the same higher-level transcriptional program during respective  
316 early and late developmental phases.

317 The stem-preferred spatial-temporal GRNs exhibit different transcriptional regulatory programs  
318 that activate the stem-preferred genes over time (**Table 3, Figure 5**), revealing active TFs that  
319 temporally drive stem-specific expression during early and late development. To further explore  
320 this possibility, we compared early (juvenile, vegetative) regulators to late (floral, anthesis, grain)  
321 regulators of stem-preferred genes to identify stage-specific TFs. There were six TFs predicted to  
322 regulate at least one AOSS or TSSE gene during the early stages (SP-Early regulators:  
323 AIB/Sobic.003G272200 (regulatory edges to 1 AOSS and 3 TSSE), Sobic.004G283300/Integrase-  
324 type DNA binding superfamily protein (regulatory edges to 3 TSSE), PDF2/ Sobic.007G065300  
325 (regulatory edges to 3 AOSS and 2 TSSE), bHLH/Sobic.007G189400 (regulatory edges to 1 AOSS  
326 and 4 TSSE), MYB61/Sobic.009G036500 (regulatory edges to 2 TSSE), and  
327 WRKY33/Sobic.009G100500 (regulatory edges to 2 TSSE)). Only one TF was identified that  
328 uniquely regulates the expression of stem-specific genes during the late developmental stages in  
329 the AOSS and TSSL gene groups (SP-Late regulator: RSM2/ Sobic.009G235500 (regulatory  
330 edges to 6 AOSS and 4 TSSL)).

331 Next, we tested whether there are unique TFs belonging to different CREs that turn on AOSS  
332 genes vs. TSSE or TSSL genes. Therefore, we tested whether there are: a) unique TF regulators  
333 specific to AOSS genes during early stages; b) unique TF regulators specific to AOSS genes during  
334 late stages; c) unique TF regulators specific to TSSE genes during early stages; and d) unique TF  
335 regulators specific to TSSL during late stages. There were no TFs unique to the AOSS and TSSL  
336 networks over time. However, three TFs, MYB61, WRKY33, and Sobic.004G283300, are  
337 predicted to uniquely regulate TSSE genes during juvenile and vegetative networks.

### 338 **Comparison of gene regulatory networks of stem-preferred genes between BTx623 and Della** 339 **cultivars**

340 To examine if there is conserved regulation of stem-specific gene expression among grain and  
341 sweet sorghum varieties we compared the temporal stem-specific GRNs between *cv.* BTx623  
342 (grain) and *cv.* Della (sweet) using transcriptome profiles from McKinley et al. (2018) and  
343 McCormick et al. (2018). Comparative analysis revealed little consensus among regulatory edges  
344 (average consensus of 1.8% for AOSS, 1.8% for TSSE, 1.3% for TSSL) between BTx623 and  
345 Della GRNs at comparable developmental stages (**Figure 6, Figure 7, Figure 8**). Thus, GRN  
346 analysis suggests that there are different transcriptional regulatory programs regulating the  
347 expression of stem-specific genes in these two cultivars. While the majority of regulatory edges  
348 directly connected to the stem-specific genes are variable between the two cultivars, it is interesting  
349 to note that whole network analysis revealed that the same TF hubs are conserved, with an average  
350 consensus of 38.9%, 39.5%, and 46.0% in the AOSS, TSSE, and TSSL, respectively.

351 To further investigate the variation in regulatory edges in the stem GRNs between cultivars,  
352 we explored the genetic sequences of stem expressed GOIs. Various events can alter the expression  
353 of a gene, such as insertions, deletions, and point mutations in either the gene of interest or the  
354 transcription factors (TFs) that regulate that gene. Regulatory DNA variants adjacent to or within  
355 tissue-specific genes or their corresponding transcriptional regulators may influence gene  
356 expression patterns in different cultivars. While many mechanisms can regulate these genes  
357 differently (i.e. involvement of various cell- and species-specific non-coding cellular factors such  
358 as post-transcriptional regulators and post-translational modifications), it is reasonable to examine  
359 the contribution of cis-regulatory element variants for divergent regulation. This was elucidated  
360 by estimating genetic variation between BTx623 and Della *cvs.*, for insertions, deletions, and point

361 mutations. Several single nucleotide variations (SNVs) and/or structural variations (SVs) between  
362 BTx623 and Della were found in the gene body, 1.5 kbp upstream, and/or 500 bp downstream  
363 regions for a number of stem-expressed genes in the AOSS, TSSE, and TSSL gene groups. The  
364 list of SNVs and SVs found in each of these groups is in *File S1* and *File S2*, respectively. For  
365 example, within the AOSS group of genes, six out of ten genes had at least one SNV and/or SVs  
366 in the gene body, 1.5 kbp upstream, or 500 bp downstream region between BTx623 and Della. Of  
367 these genes, four contained these mutations within a CRE (*Table 4* and *Figure S3*) in their putative  
368 promoter regions. For example, both Sorghum homologous of KNAT1 (Sobic.001G106000 and  
369 Sobic.001G106200) had multiple CREs with SNVs, including *NAC*, *TBP*, *SBP*, *AT-Hook*, *GATA*,  
370 *ARR-B*, *bZIP*, *C2H2*, *MADS-Box* (*Table 4*).

### 371 **Genetic variation in hierarchical regulators may contribute to the differential activation of** 372 **stem-specific genes among Sorghum cultivars**

373 In cases where stem-expressed GOIs have different GRNs but no genetic variations  
374 between the cultivars, we explored if genetic alterations exist in the genes encoding TFs predicted  
375 to regulate the stem-specific GOIs. Again, several single nucleotide variations (SNVs) and/or  
376 structural variations (SVs) between BTx623 and Della were found in the gene body, 1.5 kbp  
377 upstream, and/or 500 bp downstream regions for a number of TFs predicted to regulate stem-  
378 expressed genes in the AOSS, TSSE, and TSSL gene groups (*File S1* and *File S2*). For example,  
379 271 out of 381 total TFs across the AOSS GRNs had at least one SNV and/or SV within the gene  
380 region under investigation. Of those, 167 TF genes (136 are considered network hubs) had genetic  
381 alterations inside a CRE within their putative promoter region. Key TF hubs with variations  
382 include PHB, ATHB15, KNAT1, GATA4, ABF4, AGL7, HB-7, TGA4, VIP1, MYB48, FMA,  
383 GBF3, and LHY1. TF hubs with genetic variations likely contribute to the observed global  
384 differences in stem GRNs between cultivars. In a specific example, Sobic.006G026300 is one of  
385 most stem-specific and highly expressed genes in Sorghum *cv.* BTx623. *Figure 10* shows TFs  
386 predicted to regulate Sobic.006G026300 over the five developmental stages. The network  
387 prediction for Sobic.006G026300 in *cv* BTx623 and *cv* Della showed different regulation patterns  
388 (*Figure 9*). The genomic region of this gene is highly conserved with no observed mutations  
389 within the gene body or up- or down-stream non-coding regulatory regions (*Figure S2*). One  
390 explanation could be genetic variations present in the genes encoding the TF regulators between

391 cultivars. **Table 5** contains list of SNVs and SVs for some of the predicted TF regulators of  
392 Sobic.006G026300, including NAC1 (Sobic.008G164800), a regulator during the vegetative –  
393 grain stages (**Figure 10**), that has several significant structural variation, namely TBP (INS), bZIP  
394 (INS/RPL), AT-Hook (INS/RPL). Likewise, the TF bHLH93 (Sobic.001G513700), a regulator  
395 during the juvenile-vegetative stages (**Figure 10**), has structural variations within the RAV (DEL),  
396 MADS-Box (DEL), G2-like (DEL), ERF (INS), and C2H2 (INS) CREs, and the TF ABF4  
397 (Sobic.002G225100), also a regulator during the juvenile stage, has a 24 bp and a 29 bp deletion  
398 next to each other flanking WRKY, MYB, MYB-related CREs, and 21 bp insertions within the  
399 bZIP and bHLH CREs in its putative promoter region. Because changes in stem-specific gene  
400 expression between species could also arise by diversification of master-regulators, altering hub  
401 expression can cause large-scale network changes, potentially driving the different tissue-specific  
402 gene regulatory networks we observed.

403

## 404 CONCLUSIONS

405 Using *in-silico* analysis of spatial-temporal transcriptome datasets, we report a set of “stem-  
406 specific” genes that are always expressed in the stem throughout development, and “stem-  
407 preferred” genes that are transiently stem-specific over development. This includes genes known  
408 to be involved in vascular tissue development and/or function such as KNAT1, HB7, MYC2,  
409 CLV3, SUVR1, WRKY12, AGO1, PLC2 (Hoon Jung and Mo Park, 2007; Martínez-Navarro *et*  
410 *al.*, 2013; De Rybel *et al.*, 2016; Hennet *et al.*, 2020). The identification of common cis-regulatory  
411 elements within the promoters of stem-specific and stem-preferred genes suggest co-regulation,  
412 which was further explored using predictive GRNs. Network analysis revealed that GRN topology  
413 changes over time, indicating that different transcriptional regulatory programs are responsible for  
414 the temporal activation of the stem-expressed genes. However, TF hubs appear to be conserved  
415 across the temporal stem GRNs and include known regulators of stem genes as well as TFs not  
416 previously implicated in stem development/function that merit further investigation.

417 The analysis of temporal stem GRNs between grain and sweet sorghum varieties revealed striking  
418 differences in the regulatory landscape, which is not entirely surprising given the considerable  
419 phenotypic differences between grain and sweet sorghums. The sorghum BTx623 cultivar is an  
420 early maturing grain sorghum genotype with short stature, which is phenotypically distinct from



421 the tall, late-maturing Della cultivar (sweet sorghum genotype), typically grown for stem sugars  
422 or high biomass yield (Jiang *et al.*, 2013; Cooper *et al.*, 2019). BTx623 encodes recessive alleles  
423 of the dwarfing gene *Dw1* (Hilley *et al.*, 2016) that encodes a protein involved in brassinosteroid  
424 signaling (Hirano *et al.*, 2017) and *Dw3*, a gene that encodes an ABCB1 auxin efflux transporter  
425 (Multani *et al.*, 2003; Knöller *et al.*, 2010), whereas Della is dominant for both dwarfing loci. The  
426 difference in dwarfing genotype results in differences in internode lengths and the ratio of  
427 node/internode tissues in BTx623 and Della. Grain sorghums develop treachery elements during  
428 xylem formation earlier than sweet sorghums, and sweet sorghums accumulate more stem sugars  
429 compared to grain sorghum (Jiang *et al.*, 2013; Cooper *et al.*, 2019). Grain sorghums usually  
430 contain less carbohydrate in the upper internodes at grain maturity compared with sweet sorghum  
431 varieties, due to mobilization of carbon from stems during grain filling. The divergence of stem  
432 related genes between the two types has previously been suggested from genetic variation analysis  
433 (Jiang *et al.*, 2013; Cooper *et al.*, 2019), and the present study suggests genomic divergence in  
434 stem-expressed genes based on their developmental transcriptomes and regulatory programs.

435 Genomic perturbations such as single nucleotide variants and large structural variants can lead to  
436 an altered function or expression of TFs involved in stem-specific functions that lead to  
437 downstream changes in TF activity (e.g., HD-ZIP, MYB, NAC, TALE). Significant nucleotide  
438 sequence variation in a canonical TF binding motif in a promoter or enhancer region affects the  
439 prediction of TF-target edges in a regulatory network. Such perturbations in CRE sites within  
440 putative promoter regions of stem-expressed genes resulted in different GRNs for *BTx623* and  
441 *Della* cultivars. However, further studies are needed to confirm “real” TF-target interactions  
442 through experiments such as yeast-one hybrid (Y1H) (Arda and Walhout, 2009; Fuxman Bass,  
443 Reece-Hoyes and Walhout, 2016) or DAP-seq (O’Malley *et al.*, 2016). Nonetheless, the current  
444 study provides a starting point for more in-depth experiments to assess the extent to which these  
445 promoter elements are tissue-specific through targeted mutagenesis, for example, using tissue-  
446 specific genome modification (Schürholz *et al.*, 2018; Decaestecker *et al.*, 2019; Shi *et al.*, 2019;  
447 Ali, Mahfouz and Mansoor, 2020). This will greatly benefit efforts to fine-tune manipulation of  
448 tissue-specific and developmental-stage specific gene expression of transgenes required to  
449 genetically engineer sorghum stems to accumulate oil and elevate its status as a biofuel crop.

450

## 451 **Methods**

### 452 **RNA-Seq data set representing different tissues over 5 development time points**

453 We used a publicly available *Sorghum bicolor* transcriptomic dataset containing expression  
454 profiles of 38 tissue samples (McCormick *et al.*, 2018b) representing four plant organs (stem, leaf,  
455 root, and reproductive structures) over five developmental stages (juvenile, vegetative, floral  
456 initiation, anthesis, and grain maturity). This dataset was used to obtain a tissue-specific expression  
457 atlas (**Table 1**).

458 The quality cleaned raw reads of the 38 RNA-seq samples, *Sorghum bicolor* (*cv* BTx623) reference  
459 genome (S. bicolor v3.1.1), and genome annotations were downloaded from Phytozome  
460 (phytozome.jgi.doe.gov). The reads were then mapped to the reference genome using the  
461 STAR/2.6.0c-aligner (Dobin *et al.*, 2013). Read numbers that mapped to each gene were counted  
462 by featureCounts v.1.4.5-pl under the subread/1.5.2 package (Liao, Smyth and Shi, 2014). The  
463 normalized gene expression levels were estimated as in transcripts-per-million (TPM) using  
464 modules from edgeR package (Robinson, McCarthy and Smyth, 2010) in R (R Development Core  
465 Team, 2019). In a given tissue sample at a given developmental stage, genes having more than five  
466 counts per million (CPM) were considered as expressed. To visualize close grouping of spatial-  
467 temporal samples, hierarchical clustering and principal component analysis (PCA) of the log-  
468 transformed and quantile normalized TPM counts was performed and visualized using  
469 ‘FactoMineR’ R package (**Figure 1**). This revealed that roots, stems, and leaves formed distinct  
470 clusters based on gene expression, while stem samples formed a cluster with the peduncle and  
471 panicle (**Figure 1**). Grass peduncles are the specialized stem internodes formed after floral  
472 initiation that support the panicle, consistent with co-clustering with other stem tissues. Peduncle  
473 tissue and the first panicle tissue sample was collected from BTx623 approximately 7 days after  
474 floral initiation when the peduncle/panicle was in an early stage of development. During early  
475 stages of inflorescence development, the rachis, the stem tissue of an inflorescence, constitutes a  
476 large portion of harvested panicle tissue. This helps explain why stem, peduncle and panicle  
477 tissues form a cluster.

### 478 **Identification of stem-preferred genes**

479 We computed a tissue-specificity index to explicitly identify stem-specific genes expressed  
480 constitutively across all development stages or only during a specific developmental stage using  
481 tissue-specific RNA-seq gene expression profiles from McCormick et al. 2018. In this study, Tau  
482 Index ( $\tau$ ) (Kryuchkova-Mostacci and Robinson-Rechavi, 2016) was used to identify tissue-specific  
483 and broadly expressed genes. The index  $\tau$  is defined as:

$$484 \quad \tau = \frac{\sum_{i=1}^N (1 - x_i)}{N - 1}$$

485 Where,  $N$  is the number of tissue types, and  $x_i$  is the expression profile component for a given gene  
486 in a given tissue, normalized by the maximal expression value of the given gene from all tissue  
487 samples considered. A custom R script adapted from (Kryuchkova-Mostacci and Robinson-  
488 Rechavi, 2016) was used to perform Tau index analysis ([https://github.com/Madara-  
489 Dilhani/Tissue\\_Specificity](https://github.com/Madara-Dilhani/Tissue_Specificity)). The  $\tau$  values can vary from 0-1; genes with a  $\tau$  value of 1 being  
490 absolute tissue-specific genes that are only expressed in a single tissue, and genes with a  $\tau$  value  
491 of 0 are expressed in all tissues. Generally, tissue-specificity measures produce a bimodal  
492 distribution enabling identification of these groups, a) 0-0.2 tissue specificity (non/low specificity,  
493 housekeeping genes), b) 0.2-0.8 tissue specificity (intermediate specificity), c) 0.8-1.0 tissue  
494 specificity (high/absolute specificity). For example, “Housekeeping Genes” are often expressed in  
495 many (or all) tissues with no enriched expression for a particular tissue, thus the reported Sorghum  
496 housekeeping genes PP2A (Sobic.004G092500, Sobic.010G174800, Sobic.001G492300,  
497 Sobic.001G049400, Sobic.001G251700) and EIF4- $\alpha$  (Sobic.004G039400, Sobic.004G356900,  
498 Sobic.006G121100, Sobic.010G251100, Sobic.001G224400, Sobic.002G335600,  
499 Sobic.003G442400) had  $\tau$  values  $< 0.2$  (Sudhakar Reddy *et al.*, 2016; Nguyen, Eamens and Grof,  
500 2018). A few previously reported maize stem-preferred gene homologs in sorghum were identified  
501 as highly stem specific ( $\tau = 1$ ); Glycosyl Hydrolase (Sobic.002G273500), AP2  
502 (Sobic.003G203800, Sobic.008G149400), KNAT (Sobic.001G106000, Sobic.001G106200,  
503 Sobic.001G075101), RNI (Sobic.001G075101, Sobic.006G022500, Sobic.006G088820), WRKY  
504 (Sobic.004G298400, Sobic.006G166300), SUV (Sobic.004G218000), CLAVATA  
505 (Sobic.004G207000), BRX (Sobic.006G203200), CDC2 (Sobic.006G202100) (Hoopes *et al.*,  
506 2019).

507 The mean gene expression (quantile normalized log-TPM) across replicates within an organ at a  
508 single developmental stage was determined. The  $\tau$  index was calculated per each expressed gene  
509 at each developmental stage. The  $\tau$  index is associated with its respective tissue with maximum  
510 expression. In this analysis, a gene was considered tissue-specific if it had a  $\tau = 1$ . Following  $\tau$   
511 analysis, three groups were identified: 1) genes that are always tissue-specific throughout  
512 development, now called Always On Stem Specific (AOSS), 2) genes that are stem-specific during  
513 early developmental stages (juvenile and vegetative), now called Temporally Stem Specific Early  
514 (TSS-Early), and 3) genes that are tissue-specific during late developmental stages (floral initiation  
515 – grain maturity), now called Temporally Stem Specific Late (TSS-Late). The log<sub>2</sub>-TPM values of  
516 3 categories of stem-specific genes were visualized in heatmaps generated using ggplot2 R  
517 package (**Figure 2**).

### 518 **Enrichment of biological functions and cis-regulatory elements**

519 We identified sets of enriched gene ontology terms (GO-terms), and cis-regulatory elements  
520 (CREs) for each stem-specific gene set separately (AOSS, TSS-Early, TSS-Late). The GO  
521 enrichment tool (p-value  $p \leq 0.01$ ) at PlantTFDB v5.0 (<http://planttfdb.gao-lab.org>) was used to  
522 identify enriched GO terms (**Figure 3**). Furthermore, the promoters of tissue-specific gene sets  
523 were analyzed to identify enriched CREs. The PlantPan 4.0 TF binding site tool  
524 (<http://plantpan.itps.ncku.edu.tw/index.html>) was used to map a position weight matrix (PWM) of  
525 known plant TF binding motifs to promoters of all genes in the *Sorghum bicolor* (cv BTx623)  
526 genome. The putative promoter sequences of all sorghum genes were limited to 1500 bp upstream  
527 from -1 position from the start codon of the gene. The enrichment of CREs in the promoter regions  
528 of tissue-specific genes were calculated based on frequency of occurrence of CREs in the promoter  
529 regions compared to occurrence in all promoters in the genome (fold change  $\geq 1.5$ , adjusted FDR  
530  $\leq 0.05$ ). Here, CREs that were present in both (+) and (-) strand were considered. The enriched  
531 CREs in each stem-specific gene set (AOSS, TSS-Early, TSS-Late) is visualized in **Figure 4**.

### 532 **Stem-preferred gene regulatory network (GRN) construction**

533 We constructed five gene regulatory networks, in which pairwise correlation analysis (Pearson  
534 correlation  $\geq |0.7|$  and Mutual Rank  $\geq |0.7|$ , p-value  $\leq 0.05$ ) was performed for all stem-preferred  
535 genes (AOSS, TSS-Early, TSS-Late) and stem-expressed TFs accounting for CREs enriched for

536 each stem-preferred gene and stem-expressed TFs (Obayashi and Kinoshita, no date). Gene-gene  
537 edges are defined by Pearson Correlation Coefficients (PCC) over 0.7 with a Mutual Rank (MR)  
538  $> 0.7$ . The MR is another co-expression measure which takes a geometric average of the PCC rank  
539 from gene A to gene B and that of gene B to gene A. The use of MR measure makes sure only  
540 highly significant co-expressed gene pairs are considered. TF-target associations were predicted  
541 using known plant TF binding motifs mapped to 1.5 kbp upstream from the start of each gene, in  
542 which only enriched CREs were considered. The final GRN is a merged network that contain TF-  
543 to-gene connections, which have highly correlated expression. Networks were constructed using a  
544 custom R script ([https://github.com/Madara-Dilhani/GeneReg\\_Network](https://github.com/Madara-Dilhani/GeneReg_Network)) and visualized using  
545 Cytoscape (version 3.8). Network analysis was performed in NetworkAnalyzer tool in Cytoscape  
546 to assess network properties.

#### 547 **Variation in stem-preferred GRN of Grain Sorghum and Sweet Sorghum genotypes**

548 We used RNA-seq data of *Sorghum bicolor cv Della* stem tissue for 11 different time points  
549 covering five development stages from McKinley et al. (2018) to evaluate conserved gene  
550 regulation of stem-preferred genes between sweet and grain sorghum varieties. McKinley et al.  
551 (2018) had sampled *Sorghum bicolor cv Della* stem tissue samples by taking the 10th internode of  
552 the stem at the following time points: Days after emergence (DAE), days before Anthesis (DBA),  
553 and days after anthesis (DAA). At the juvenile stage: 14 DAE/-55 DBA; at the vegetative stage:  
554 29 DAE/-40 DBA, 31 DAE/-38 DBA, 40 DAE/-29 DBA; at floral initiation: 53 DAE/ -16 DBA,  
555 62 DAE/-7 DBA; at anthesis: 69 DAE/Anthesis; at grain maturity: 80 DAE/+11 DAA, 94  
556 DAE/+25 DAA; at post-grain maturity: 102 DAE/+43 DAA, 137 DAE/+68 DAA. We used  
557 publicly available raw counts for all the samples obtained from Phytozome to normalize gene  
558 expression levels using modules from edgeR package (Robinson, McCarthy and Smyth, 2010) in  
559 R (R Core Team, 2019). We constructed eleven gene regulatory networks (GRNs) for 11 time  
560 points sampled representing 5 developmental stages. The co-expression analysis (Pearson  
561 correlation  $\geq |0.7|$  and Mutual Rank  $\geq |0.7|$ , p-value  $\leq 0.05$ ) was performed for all stem-preferred  
562 genes (AOSS, TSS-Early, TSS-Late) and expressed TFs accounting for CREs enriched for each  
563 stem-preferred gene and stem-expressed TFs (Obayashi & Kinoshita, 2009). Gene regulatory  
564 networks between BTx623 and Della were compared for comparable time points, which were  
565 selected based on time of sample collection in their respective developmental maturities and

566 anatomical similarity (McKinley et al., 2018). The comparable time points were as follows: a)  
567 Juvenile - BTx623-8 DAE with Della-14 DAE, b) Vegetative - BTx623-24 DAE with Della-29  
568 DAE, c) Anthesis - BTx623-65 DAE with Della-69 DAE, d) Grain Maturity - BTx623-96 DAE  
569 with Della-94 DAE.

## 570 **Single nucleotide and structural variations in regulatory regions of stem-preferred genes and** 571 **their regulatory TFs between *Sorghum bicolor cv BTx623* and *Sorghum bicolor cv Della***

572 We collected Della re-sequenced genome and variant reports  
573 ([https://genome.jgi.doe.gov/portal/Sorbicsequencing\\_9/Sorbicsequencing\\_9.info.html](https://genome.jgi.doe.gov/portal/Sorbicsequencing_9/Sorbicsequencing_9.info.html)), where  
574 authors used the following variant calling pipeline: a) The Della re-sequenced reads were mapped  
575 to the BTx623 reference genome using BWA (Li and Durbin, 2009), b) putative single nucleotide  
576 point (SNP) mutation and small indel sites were identified by using samtools (Li *et al.*, 2009),  
577 bcftools (Danecek, Schiffels and Durbin, 2016), vcfutils (Danecek *et al.*, 2011), picard (*Picard*  
578 *Tools - By Broad Institute*, no date), snpEff, (Cingolani *et al.*, 2012), c) putative large structural  
579 variant sites such as deletions, insertions, inversions, intra-chromosomal translocations, inter-  
580 chromosomal translocations using following tools; BreakDancer (Fan *et al.*, 2014), Pindel (Ye *et*  
581 *al.*, 2009). For this study, we predicted significant point mutations and structural variants within  
582 1.5 kb upstream promoter region, gene body, and 500 bp downstream region of tissue-specific  
583 genes and their regulators in respective developmental stages from BTx623 gene regulatory  
584 network to identify variable and conserved regulatory regions.

585

586 **Data availability statement:** There is no data associated with this manuscript. R script for  
587 tissue-specificity analysis is available at [https://github.com/Madara-Dilhani/Tissue\\_Specificity](https://github.com/Madara-Dilhani/Tissue_Specificity).  
588 Other scripts used for network analysis are available at [https://github.com/Madara-](https://github.com/Madara-Dilhani/GeneReg_Network)  
589 [Dilhani/GeneReg\\_Network](https://github.com/Madara-Dilhani/GeneReg_Network).

590

591

## 592 **Acknowledgements:**

593 *This work was funded by the DOE Center for Advanced Bioenergy and Bioproducts Innovation*  
594 *(U.S. Department of Energy, Office of Science, Office of Biological and Environmental Research*



595 *under Award Number DE-SC0018420) and in part by the DOE Great Lakes Bioenergy Research*  
596 *Center (DOE BER Office of Science DE-FC02-07ER64494). Any opinions, findings, and*  
597 *conclusions or recommendations expressed in this publication are those of the author(s) and do*  
598 *not necessarily reflect the views of the U.S. Department of Energy.*

599

600 **Author contributions:** MHA and AMC conceived the project; MHA, AMC, and JEM designed  
601 the experiments; JEM contributed the data; MHA performed all data analysis; MHA, AMC, and  
602 JEM wrote the manuscript. All authors reviewed and approved of the manuscript.

603

604 **Conflicts of interest statement:** The authors of this manuscript claim no conflicts of interest.

605

## 606 **Supporting Information**

607 **Figure S1:** Expression dynamics of highly expressed most stem-specific AOSS genes in Sorghum  
608 cv BTx623 and cv Della.

609 **Figure S2:** The view upstream non-coding region, gene body, downstream non-coding region of  
610 3 highly expressed most stem-specific AOSS genes from Integrated Genomic Viewer (IGV).

611 **Figure S3:** The view upstream non-coding region, gene body, downstream non-coding region of  
612 AOSS genes with significant genetic alterations from Integrated Genomic Viewer (IGV).

613 **Figure S4:** The Integrated Genomic Viewer (IGV) view upstream non-coding region, gene body,  
614 downstream non-coding region of regulatory TFs of Sobic.006G024800 during a) Early stage and  
615 b) Late stage.

616 **Table S1:** Previously known xylem and phloem specific cis-regulatory element in different  
617 vascular specific promoters

618 **Table S2:** Statistics of tissue-specific genes across tissues during development

619 **Table S3:** Tissue-specificity Index by stages for AOSS, TSS-Early, TSS-Late genes

620 **Table S4:** Transcription factors which are TF hubs in at least one of the 15 GRNs

621 **Table S5:** Transcription factors which showed change of TF hub characteristics in early and late  
622 developmental stages

623 **File S1:** The list of predicted single nucleotide variations (SNVs) between BTx623 and Della  
624 found in the gene body, 1.5 kbp upstream (including predicted CREs) for stem-expressed genes in  
625 the AOSS, TSSE, and TSSL gene group and their TF regulators.

626 **File S2:** The list of predicted structural variations (SVs) between BTx623 and Della found in the  
627 gene body, 1.5 kbp upstream (including predicted CREs) for stem-expressed genes in the AOSS,  
628 TSSE, and TSSL gene group and their TF regulators.

629 **Data S1:** TF–target gene interactions for each of 15 GRNs generated for this study is presented in  
630 .sif files.

631

632

### 633 **References**

634 Ali, Z., Mahfouz, M. M. and Mansoor, S. (2020) ‘CRISPR-TSKO: A Tool for Tissue-Specific  
635 Genome Editing in Plants’, *Trends in Plant Science*. Elsevier Ltd, pp. 123–126. doi:  
636 10.1016/j.tplants.2019.12.002.

637 Arda, H. E. and Walhout, A. J. M. (2009) ‘Gene-centered regulatory networks’. doi:  
638 10.1093/bfpg/elp049.

639 Arendsee, Z. W., Li, L. and Wurtele, E. S. (2014) ‘Coming of age: Orphan genes in plants’,  
640 *Trends in Plant Science*. doi: 10.1016/j.tplants.2014.07.003.

641 Barabási, A.-L. and Oltvai, Z. N. (2004) ‘Network biology: understanding the cell’s functional  
642 organization’, *Nature Reviews Genetics*, 5(2), pp. 101–113. doi: 10.1038/nrg1272.

643 Baud, S. (2018) ‘Seeds as oil factories’, *Plant Reproduction*. Springer Verlag, pp. 213–235. doi:  
644 10.1007/s00497-018-0325-6.

645 Beechey-Gradwell, Z. *et al.* (2020) ‘Storing carbon in leaf lipid sinks enhances perennial  
646 ryegrass carbon capture especially under high N and elevated CO<sub>2</sub>’, *Journal of Experimental*  
647 *Botany*, 71(7), pp. 2351–2361. doi: 10.1093/jxb/erz494.

- 648 Bensussan, M. *et al.* (2015) ‘Suppression of dwarf and Irregular Xylem phenotypes generates  
649 low-acetylated biomass lines in arabidopsis’, *Plant Physiology*. American Society of Plant  
650 Biologists, 168(2), pp. 452–463. doi: 10.1104/pp.15.00122.
- 651 Byrne, M. E., Simorowski, J. and Martienssen, R. A. (2002) ‘ASYMMETRIC LEAVES1 reveals  
652 know gene redundancy in Arabidopsis’, *Development*, pp. 1957–1965.
- 653 Byrt, C. S., Grof, C. P. L. and Furbank, R. T. (2011) ‘C4 Plants as Biofuel Feedstocks:  
654 Optimising Biomass Production and Feedstock Quality from a Lignocellulosic Perspective’,  
655 *Journal of Integrative Plant Biology*. J Integr Plant Biol, pp. 120–135. doi: 10.1111/j.1744-  
656 7909.2010.01023.x.
- 657 Caño-Delgado, A., Lee, J.-Y. and Demura, T. (2010) ‘Regulatory Mechanisms for Specification  
658 and Patterning of Plant Vascular Tissues’, *Annual Review of Cell and Developmental Biology*.  
659 Annual Reviews, 26(1), pp. 605–637. doi: 10.1146/annurev-cellbio-100109-104107.
- 660 Cao, X. *et al.* (2007) ‘Abscisic acid and stress signals induce Viviparous1 expression in seed and  
661 vegetative tissues of maize’, *Plant Physiology*. Plant Physiol, 143(2), pp. 720–731. doi:  
662 10.1104/pp.106.091454.
- 663 Carlsson, A. S. *et al.* (2011) ‘Replacing fossil oil with fresh oil - with what and for what?’,  
664 *European Journal of Lipid Science and Technology*. Wiley-Blackwell, pp. 812–831. doi:  
665 10.1002/ejlt.201100032.
- 666 Chen, L. *et al.* (2015) ‘The characterization of GmTIP, a root-specific gene from soybean, and  
667 the expression analysis of its promoter’, *Plant Cell, Tissue and Organ Culture*. Kluwer  
668 Academic Publishers, 121(2), pp. 259–274. doi: 10.1007/s11240-014-0682-2.
- 669 Cingolani, P. *et al.* (2012) ‘A program for annotating and predicting the effects of single  
670 nucleotide polymorphisms, SnpEff: SNPs in the genome of *Drosophila melanogaster* strain  
671 w1118; iso-2; iso-3’, *Fly*. Taylor and Francis Inc., 6(2), pp. 80–92. doi: 10.4161/fly.19695.
- 672 Cohen, R., Havlin, S. and ben-Avraham, D. (2002) ‘Structural properties of scale-free networks’,  
673 *Handbook of Graphs and Networks*. (Wiley Online Books), pp. 85–110. doi:  
674 doi:10.1002/3527602755.ch4.
- 675 Cooper, E. A. *et al.* (2019) ‘A new reference genome for *Sorghum bicolor* reveals high levels of

- 676 sequence similarity between sweet and grain genotypes: Implications for the genetics of sugar  
677 metabolism’, *BMC Genomics*. BioMed Central Ltd., 20(1), p. 420. doi: 10.1186/s12864-019-  
678 5734-x.
- 679 da Costa, R. M. F. *et al.* (2014) ‘Genotype, development and tissue-derived variation of cell-wall  
680 properties in the lignocellulosic energy crop *Miscanthus*’, *Annals of Botany*, 114(6), pp. 1265–  
681 1277. doi: 10.1093/aob/mcu054.
- 682 Danecek, P. *et al.* (2011) ‘The variant call format and VCFtools’, *BIOINFORMATICS*  
683 *APPLICATIONS NOTE*, 27(15), pp. 2156–2158. doi: 10.1093/bioinformatics/btr330.
- 684 Danecek, P., Schiffels, S. and Durbin, R. (2016) *Multiallelic calling model in bcftools (-m)*.
- 685 Decaestecker, W. *et al.* (2019) ‘CRISPR-Tsko: A technique for efficient mutagenesis in specific  
686 cell types, tissues, or organs in *Arabidopsis*[open]’, *Plant Cell*. American Society of Plant  
687 Biologists, 31(12), pp. 2868–2887. doi: 10.1105/tpc.19.00454.
- 688 Deikman, J., Kline, R. and Fischer, R. L. (1992) ‘Organization of ripening and ethylene  
689 regulatory regions in a fruit-specific promoter from tomato (*Lycopersicon esculentum*)’, *Plant*  
690 *Physiology*. American Society of Plant Biologists, 100(4), pp. 2013–2017. doi:  
691 10.1104/pp.100.4.2013.
- 692 Demirbas, A. (2007) ‘Progress and recent trends in biofuels’, *Progress in Energy and*  
693 *Combustion Science*. Pergamon, 33(1), pp. 1–18. doi: 10.1016/j.peccs.2006.06.001.
- 694 Demirbas, T. and Demirbas, A. H. (2010) ‘Bioenergy, Green Energy. Biomass and Biofuels’,  
695 *Energy Sources, Part A: Recovery, Utilization, and Environmental Effects*, 32(12), pp. 1067–  
696 1075. doi: 10.1080/15567030903058600.
- 697 Dobin, A. *et al.* (2013) ‘STAR: ultrafast universal RNA-seq aligner’, *Bioinformatics*. Narnia,  
698 29(1), pp. 15–21. doi: 10.1093/bioinformatics/bts635.
- 699 Donoghue, M. T. *et al.* (2011) ‘Evolutionary origins of Brassicaceae specific genes in  
700 *Arabidopsis thaliana*’, *BMC Evolutionary Biology*, 11(1). doi: 10.1186/1471-2148-11-47.
- 701 Douglas, S. J. *et al.* (2002) ‘KNAT1 and ERECTA regulate inflorescence architecture in  
702 *Arabidopsis*’, *Plant Cell*, 14(3), pp. 547–558. doi: 10.1105/tpc.010391.

- 703 Durrett, T. P., Benning, C. and Ohlrogge, J. (2008) ‘Plant triacylglycerols as feedstocks for the  
704 production of biofuels’, *Plant Journal*. *Plant J*, pp. 593–607. doi: 10.1111/j.1365-  
705 313X.2008.03442.x.
- 706 Dutt, M. *et al.* (2014) ‘Temporal and spatial control of gene expression in horticultural crops’,  
707 *Horticulture Research*. Nature Publishing Group, pp. 1–17. doi: 10.1038/hortres.2014.47.
- 708 Dyer, J. M. and Mullen, R. T. (2005) ‘Development and potential of genetically engineered  
709 oilseeds’, *Seed Science Research*. Cambridge University Press (CUP), 15(4), pp. 255–267. doi:  
710 10.1079/ssr2005216.
- 711 Emery, J. F. *et al.* (2003) ‘Radial Patterning of Arabidopsis Shoots by Class III HD-ZIP and  
712 KANADI Genes’, *Current Biology*. Cell Press, 13(20), pp. 1768–1774. doi:  
713 10.1016/j.cub.2003.09.035.
- 714 Fan, J., Yan, C. and Xu, C. (2013) ‘Phospholipid:diacylglycerol acyltransferase-mediated  
715 triacylglycerol biosynthesis is crucial for protection against fatty acid-induced cell death in  
716 growing tissues of Arabidopsis’, *Plant Journal*. *Plant J*, 76(6), pp. 930–942. doi:  
717 10.1111/tpj.12343.
- 718 Fan, X. *et al.* (2014) ‘BreakDancer: Identification of genomic structural variation from paired-  
719 end read mapping’, *Current Protocols in Bioinformatics*. John Wiley and Sons Inc.,  
720 2014(SUPPL.45). doi: 10.1002/0471250953.bi1506s45.
- 721 Feltus, F. A. and Vandenbrink, J. P. (2012) ‘Bioenergy grass feedstock: Current options and  
722 prospects for trait improvement using emerging genetic, genomic, and systems biology toolkits’,  
723 *Biotechnology for Biofuels*. Biotechnol Biofuels. doi: 10.1186/1754-6834-5-80.
- 724 Floyd, S. K., Zalewski, C. S. and Bowman, J. L. (2006) ‘Evolution of class III homeodomain-  
725 leucine zipper genes in streptophytes’, *Genetics*, 173(1), pp. 373–388. doi:  
726 10.1534/genetics.105.054239.
- 727 Fuxman Bass, J. I., Reece-Hoyes, J. S. and Walhout, A. J. M. (2016) ‘Gene-centered yeast one-  
728 hybrid assays’, *Cold Spring Harbor Protocols*. Cold Spring Harbor Laboratory Press, 2016(12),  
729 pp. 1039–1043. doi: 10.1101/pdb.top077669.
- 730 Gallego-Giraldo, L. *et al.* (2016) ‘Combining enhanced biomass density with reduced lignin

- 731 level for improved forage quality’, *Plant Biotechnology Journal*. Blackwell Publishing Ltd,  
732 14(3), pp. 895–904. doi: 10.1111/pbi.12439.
- 733 Gao, J. *et al.* (2015) ‘Evolution, diversification, and expression of KNOX proteins in plants’,  
734 *Frontiers in Plant Science*. Frontiers Media S.A., 6(OCTOBER). doi: 10.3389/fpls.2015.00882.
- 735 Goldshmidt, A. *et al.* (2008a) ‘Signals derived from YABBY gene activities in organ primordia  
736 regulate growth and partitioning of Arabidopsis shoot apical meristems’, *Plant Cell*, 20(5), pp.  
737 1217–1230. doi: 10.1105/tpc.107.057877.
- 738 Goldshmidt, A. *et al.* (2008b) ‘Signals derived from YABBY gene activities in organ primordia  
739 regulate growth and partitioning of Arabidopsis shoot apical meristems’, *Plant Cell*. American  
740 Society of Plant Biologists, 20(5), pp. 1217–1230. doi: 10.1105/tpc.107.057877.
- 741 Graham, I. A. (2008) ‘Seed Storage Oil Mobilization’, *Annual Review of Plant Biology*. Annual  
742 Reviews, 59(1), pp. 115–142. doi: 10.1146/annurev.arplant.59.032607.092938.
- 743 Gujas, B. and Rodriguez-Villalon, A. (2016) ‘Plant Phosphoglycerolipids: The Gatekeepers of  
744 Vascular Cell Differentiation’, *Frontiers in Plant Science*. Frontiers Media S.A., 7(FEB2016), p.  
745 103. doi: 10.3389/fpls.2016.00103.
- 746 Harwood, J. L. *et al.* (1971) ‘On the origin of oil droplets in maturing castor bean seeds, *Ricinus*  
747 *communis*’, *Lipids*. Springer-Verlag, 6(11), pp. 851–854. doi: 10.1007/BF02531217.
- 748 Heaton, E. A., Dohlemmn, F. G. and Long, S. P. (2008) ‘Meeting US biofuel goals with less land:  
749 the potential of *Miscanthus*’, *Global Change Biology*. John Wiley & Sons, Ltd, 14(9), pp. 2000–  
750 2014. doi: 10.1111/j.1365-2486.2008.01662.x.
- 751 Helizon, H. *et al.* (2014a) ‘Class I KNOX transcription factors promote differentiation of  
752 cambial derivatives into xylem fibers in the Arabidopsis hypocotyls’, *Development (Cambridge)*.  
753 Company of Biologists Ltd, 141(22), pp. 4311–4319. doi: 10.1242/dev.111369.
- 754 Helizon, H. *et al.* (2014b) ‘Class I KNOX transcription factors promote differentiation of  
755 cambial derivatives into xylem fibers in the Arabidopsis hypocotyls’, *Development (Cambridge)*.  
756 Company of Biologists Ltd, 141(22), pp. 4311–4319. doi: 10.1242/dev.111369.
- 757 Henet, L. *et al.* (2020) ‘Transcriptional Regulation of Sorghum Stem Composition: Key Players



- 758 Identified Through Co-expression Gene Network and Comparative Genomics Analyses’,  
759 *Frontiers in Plant Science*. Frontiers Media S.A., 11, p. 224. doi: 10.3389/fpls.2020.00224.
- 760 Hill, J. *et al.* (2006) ‘Environmental, economic, and energetic costs and benefits of biodiesel and  
761 ethanol biofuels’, *Proceedings of the National Academy of Sciences of the United States of*  
762 *America*, 103(30), pp. 11206–11210. doi: 10.1073/pnas.0604600103.
- 763 Hilley, J. *et al.* (2016) ‘Identification of Dw1, a regulator of sorghum stem internode length’,  
764 *PLoS ONE*. Public Library of Science, 11(3), p. e0151271. doi: 10.1371/journal.pone.0151271.
- 765 Le Hir, R. and Bellini, C. (2013) ‘The plant-specific Dof transcription factors family: New  
766 players involved in vascular system development and functioning in Arabidopsis’, *Frontiers in*  
767 *Plant Science*. Frontiers Research Foundation. doi: 10.3389/fpls.2013.00164.
- 768 Hirakawa, Y. *et al.* (2008) *Non-cell-autonomous control of vascular stem cell fate by a CLE*  
769 *peptide/receptor system*. Available at: [www.pnas.org/cgi/content/full/](http://www.pnas.org/cgi/content/full/) (Accessed: 12 May 2020).
- 770 Hirano, K. *et al.* (2017) ‘Sorghum DW1 positively regulates brassinosteroid signaling by  
771 inhibiting the nuclear localization of BRASSINOSTEROID INSENSITIVE 2’, *Scientific*  
772 *Reports*. Nature Publishing Group, 7(1). doi: 10.1038/s41598-017-00096-w.
- 773 Hoffmann-Thoma, G. *et al.* (1996) ‘Sucrose accumulation in sweet sorghum stem internodes in  
774 relation to growth’, *Physiologia Plantarum*, 97(2), pp. 277–284. doi: 10.1034/j.1399-  
775 3054.1996.970210.x.
- 776 Hofvander, P. *et al.* (2016) ‘Potato tuber expression of Arabidopsis WRINKLED1 increase  
777 triacylglycerol and membrane lipids while affecting central carbohydrate metabolism’, *Plant*  
778 *Biotechnology Journal*. Blackwell Publishing Ltd, 14(9), pp. 1883–1898. doi:  
779 10.1111/pbi.12550.
- 780 Hoon Jung, J. and Mo Park, C. (2007) *Vascular Development in Plants: Specification of Xylem*  
781 *and Phloem Tissues*, *Journal of Plant Biology*.
- 782 Hoopes, G. M. *et al.* (2019) ‘An updated gene atlas for maize reveals organ-specific and stress-  
783 induced genes’, *The Plant Journal*. Blackwell Publishing Ltd, 97(6), pp. 1154–1167. doi:  
784 10.1111/tpj.14184.

- 785 Huang, H. *et al.* (2016) ‘Technoeconomic Analysis of Biodiesel and Ethanol Production from  
786 Lipid-Producing Sugarcane and Sweet Sorghum’, *Industrial Biotechnology*. Mary Ann Liebert  
787 Inc., 12(6), pp. 357–365. doi: 10.1089/ind.2016.0013.
- 788 Huang, H., Long, S. P. and Singh, V. (2015) ‘Ultra oil-producing’.
- 789 Huminiecki, L., Lloyd, A. T. and Wolfe, K. H. (2003) ‘Congruence of tissue expression profiles  
790 from Gene Expression Atlas, SAGEmap and TissueInfo databases’, *BMC Genomics*. BioMed  
791 Central, 4(1), p. 31. doi: 10.1186/1471-2164-4-31.
- 792 Ito, Y. *et al.* (2006) ‘Dodeca-CLE as peptides as suppressors of plant stem cell differentiation’,  
793 *Science*. American Association for the Advancement of Science, 313(5788), pp. 842–845. doi:  
794 10.1126/science.1128436.
- 795 Jang, G. *et al.* (2017) ‘Antagonistic interaction between jasmonic acid and cytokinin in xylem  
796 development’, *Scientific Reports*. Nature Publishing Group, 7(1), pp. 1–13. doi: 10.1038/s41598-  
797 017-10634-1.
- 798 Jiang, S. Y. *et al.* (2013) ‘Genetic variation and expression diversity between grain and sweet  
799 sorghum lines’, *BMC Genomics*. BioMed Central, 14(1), p. 18. doi: 10.1186/1471-2164-14-18.
- 800 Julien, P. *et al.* (2012) ‘Mechanisms and Evolutionary Patterns of Mammalian and Avian Dosage  
801 Compensation’, *PLoS Biology*. Edited by N. H. Barton. Public Library of Science, 10(5), p.  
802 e1001328. doi: 10.1371/journal.pbio.1001328.
- 803 Kanehara, K. *et al.* (2015) ‘Arabidopsis AtPLC2 Is a Primary Phosphoinositide-Specific  
804 Phospholipase C in Phosphoinositide Metabolism and the Endoplasmic Reticulum Stress  
805 Response’, *PLoS Genetics*. Public Library of Science, 11(9). doi: 10.1371/journal.pgen.1005511.
- 806 Karp, A. and Shield, I. (2008) ‘Bioenergy from plants and the sustainable yield challenge’, *New  
807 Phytologist*. John Wiley & Sons, Ltd, 179(1), pp. 15–32. doi: 10.1111/j.1469-  
808 8137.2008.02432.x.
- 809 Kebrom, T. H., McKinley, B. and Mullet, J. E. (2017) ‘Dynamics of gene expression during  
810 development and expansion of vegetative stem internodes of bioenergy sorghum’, *Biotechnology  
811 for Biofuels*. BioMed Central Ltd., 10(1), p. 159. doi: 10.1186/s13068-017-0848-3.

- 812 Kehr, J. and Kragler, F. (2018) ‘Long distance RNA movement’, *New Phytologist*, 218(1), pp.  
813 29–40. doi: 10.1111/nph.15025.
- 814 Kelly, A. A. *et al.* (2013) ‘Suppression of the *SUGAR-DEPENDENT1* triacylglycerol lipase  
815 family during seed development enhances oil yield in oilseed rape (*Brassica napus* L.)’, *Plant*  
816 *Biotechnology Journal*. John Wiley & Sons, Ltd, 11(3), pp. 355–361. doi: 10.1111/pbi.12021.
- 817 Kidner, C. A. and Martienssen, R. A. (2005) ‘The role of ARGONAUTE1 (AGO1) in meristem  
818 formation and identity’, *Developmental Biology*. Academic Press Inc., 280(2), pp. 504–517. doi:  
819 10.1016/j.ydbio.2005.01.031.
- 820 Kim, H. U. *et al.* (2015) ‘Senescence-inducible LEC2 enhances triacylglycerol accumulation in  
821 leaves without negatively affecting plant growth’, *Plant Biotechnology Journal*. Blackwell  
822 Publishing Ltd, 13(9), pp. 1346–1359. doi: 10.1111/pbi.12354.
- 823 Knöller, A. S. *et al.* (2010) ‘Brachytic2/ZmABCB1 functions in IAA export from intercalary  
824 meristems’, *Journal of Experimental Botany*, 61(13), pp. 3689–3696. doi: 10.1093/jxb/erq180.
- 825 Koçar, G. and Civaş, N. (2013) ‘An overview of biofuels from energy crops: Current status and  
826 future prospects’, *Renewable and Sustainable Energy Reviews*. Pergamon, pp. 900–916. doi:  
827 10.1016/j.rser.2013.08.022.
- 828 Kondo, Y. *et al.* (2011) ‘CLE Peptides can Negatively Regulate Protoxylem Vessel Formation  
829 via Cytokinin Signaling’, *Plant and Cell Physiology*. Oxford University Press, 52(1), p. 37. doi:  
830 10.1093/PCP/PCQ129.
- 831 Kryuchkova-Mostacci, N. and Robinson-Rechavi, M. (2016) ‘A benchmark of gene expression  
832 tissue-specificity metrics’, *Briefings in Bioinformatics*. Narnia, 18(2), p. bbw008. doi:  
833 10.1093/bib/bbw008.
- 834 Kubo, M. *et al.* (2005) ‘Transcription switches for protoxylem and metaxylem vessel formation’,  
835 *Genes and Development*, 19(16), pp. 1855–1860. doi: 10.1101/gad.1331305.
- 836 Kumar, D., Long, S. P. and Singh, V. (2018) ‘Biorefinery for combined production of jet fuel  
837 and ethanol from lipid-producing sugarcane: a techno-economic evaluation’, *GCB Bioenergy*.  
838 Blackwell Publishing Ltd, 10(2), pp. 92–107. doi: 10.1111/gcbb.12478.

- 839 Kumar, N. (2020) ‘Biotechnology for Biofuels: A Sustainable Green Energy Solution’. Springer.
- 840 Levine, M. T. *et al.* (2006) ‘Novel genes derived from noncoding DNA in *Drosophila*
- 841 *melanogaster* are frequently X-linked and exhibit testis-biased expression’, *Proceedings of the*
- 842 *National Academy of Sciences of the United States of America*, 103(26), pp. 9935–9939. doi:
- 843 10.1073/pnas.0509809103.
- 844 Li, H. *et al.* (2009) ‘The Sequence Alignment/Map format and SAMtools’, *BIOINFORMATICS*
- 845 *APPLICATIONS NOTE*, 25(16), pp. 2078–2079. doi: 10.1093/bioinformatics/btp352.
- 846 Li, H. and Durbin, R. (2009) ‘Fast and accurate short read alignment with Burrows-Wheeler
- 847 transform’, 25(14), pp. 1754–1760. doi: 10.1093/bioinformatics/btp324.
- 848 Li, N. *et al.* (2016) ‘Fatty Acid and Lipid Transport in Plant Cells’, *Trends in Plant Science*.
- 849 Elsevier Ltd, pp. 145–158. doi: 10.1016/j.tplants.2015.10.011.
- 850 Li, Y. *et al.* (2013) ‘Isolation and characterization of two novel root-specific promoters in rice
- 851 (*Oryza sativa* L.)’, *Plant Science. Plant Sci*, 207, pp. 37–44. doi: 10.1016/j.plantsci.2013.02.002.
- 852 Li, Y. *et al.* (2019) ‘Genome-scale mining of root-preferential genes from maize and
- 853 characterization of their promoter activity’, *BMC Plant Biology*. BioMed Central Ltd., 19(1), p.
- 854 584. doi: 10.1186/s12870-019-2198-8.
- 855 Liao, Y., Smyth, G. K. and Shi, W. (2014) ‘featureCounts: an efficient general purpose program
- 856 for assigning sequence reads to genomic features’, *Bioinformatics*. Narnia, 30(7), pp. 923–930.
- 857 doi: 10.1093/bioinformatics/btt656.
- 858 Lima, M. de F. *et al.* (2017) ‘Molecular mechanisms of biomass increase in plants’,
- 859 *Biotechnology Research and Innovation*. Elsevier BV, 1(1), pp. 14–25. doi:
- 860 10.1016/j.biori.2017.08.001.
- 861 Liu, Q. *et al.* (2017) ‘Genetic enhancement of oil content in potato tuber (*Solanum tuberosum* L.)
- 862 through an integrated metabolic engineering strategy’, *Plant Biotechnology Journal*. Blackwell
- 863 Publishing Ltd, 15(1), pp. 56–67. doi: 10.1111/pbi.12590.
- 864 Lung, S.-C. and Weselake, R. J. (2006) ‘Diacylglycerol acyltransferase: A key mediator of plant
- 865 triacylglycerol synthesis’, *Lipids*. John Wiley & Sons, Ltd, 41(12), pp. 1073–1088. doi:

- 866 10.1007/s11745-006-5057-y.
- 867 Maksakova, I. A. and Mager, D. L. (2005) ‘Transcriptional Regulation of Early Transposon  
868 Elements, an Active Family of Mouse Long Terminal Repeat Retrotransposons’, *Journal of*  
869 *Virology*. American Society for Microbiology, 79(22), pp. 13865–13874. doi:  
870 10.1128/jvi.79.22.13865-13874.2005.
- 871 Mallory, A. C. *et al.* (2009) ‘Redundant and Specific Roles of the ARGONAUTE Proteins  
872 AGO1 and ZLL in Development and Small RNA-Directed Gene Silencing’, *PLoS Genetics*.  
873 Edited by T. Kakutani. Public Library of Science, 5(9), p. e1000646. doi:  
874 10.1371/journal.pgen.1000646.
- 875 Martínez-Navarro, A. C. *et al.* (2013) ‘Vascular gene expression: a hypothesis’, *Frontiers in*  
876 *Plant Science*. Frontiers Research Foundation, 4(JUL), p. 261. doi: 10.3389/fpls.2013.00261.
- 877 Mathur, S. *et al.* (2017) ‘Sweet sorghum as biofuel feedstock: Recent advances and available  
878 resources’, *Biotechnology for Biofuels*. BioMed Central Ltd. doi: 10.1186/s13068-017-0834-9.
- 879 McConnell, J. R. *et al.* (2001) ‘Role of PHABULOSA and PHAVOLUTA in determining radial  
880 patterning in shoots’, *Nature*, 411(6838), pp. 709–713. doi: 10.1038/35079635.
- 881 McCormick, R. F. *et al.* (2018a) ‘The Sorghum bicolor reference genome: improved assembly,  
882 gene annotations, a transcriptome atlas, and signatures of genome organization’, *Plant Journal*.  
883 Blackwell Publishing Ltd, 93(2), pp. 338–354. doi: 10.1111/tpj.13781.
- 884 McCormick, R. F. *et al.* (2018b) ‘The *Sorghum bicolor* reference genome: improved assembly,  
885 gene annotations, a transcriptome atlas, and signatures of genome organization’, *The Plant*  
886 *Journal*. Wiley/Blackwell (10.1111), 93(2), pp. 338–354. doi: 10.1111/tpj.13781.
- 887 McKinley, B. A. *et al.* (2018) ‘Developmental dynamics of stem starch accumulation in  
888 *Sorghum bicolor*’, *Plant Direct*. John Wiley and Sons Inc., 2(8), p. e00074. doi:  
889 10.1002/pld3.74.
- 890 McLaughlin, S. B. *et al.* (2002) ‘High-value renewable energy from prairie grasses’,  
891 *Environmental Science and Technology*. American Chemical Society, 36(10), pp. 2122–2129.  
892 doi: 10.1021/es010963d.

- 893 McLaughlin, S. B. and Kszos, L. A. (2005) ‘Development of switchgrass (*Panicum virgatum*) as  
894 a bioenergy feedstock in the United States’, *Biomass and Bioenergy*. Elsevier Ltd, 28(6), pp.  
895 515–535. doi: 10.1016/j.biombioe.2004.05.006.
- 896 Mitchell, M. C. *et al.* (2020) ‘Increasing growth and yield by altering carbon metabolism in a  
897 transgenic leaf oil crop’, *Plant Biotechnology Journal*. Blackwell Publishing Ltd. doi:  
898 10.1111/pbi.13363.
- 899 Miyashima, S. *et al.* (2013) ‘Stem cell function during plant vascular development’, *EMBO*  
900 *Journal*. European Molecular Biology Organization, pp. 178–193. doi: 10.1038/emboj.2012.301.
- 901 Molla, K. A. *et al.* (2013) ‘Rice oxalate oxidase gene driven by green tissue-specific promoter  
902 increases tolerance to sheath blight pathogen (*Rhizoctonia solani*) in transgenic rice’, *Molecular*  
903 *Plant Pathology*. Mol Plant Pathol, 14(9), pp. 910–922. doi: 10.1111/mpp.12055.
- 904 Moyle, R. L. and Birch, R. G. (2013) ‘Sugarcane Loading Stem Gene promoters drive transgene  
905 expression preferentially in the stem’, *Plant Molecular Biology*. Plant Mol Biol, 82(1–2), pp. 51–  
906 58. doi: 10.1007/s11103-013-0034-3.
- 907 Mudge, S. R. *et al.* (2013) ‘Mature-stem expression of a silencing-resistant sucrose isomerase  
908 gene drives isomaltulose accumulation to high levels in sugarcane’, *Plant Biotechnology*  
909 *Journal*. Plant Biotechnol J, 11(4), pp. 502–509. doi: 10.1111/pbi.12038.
- 910 Mullet, J. *et al.* (2014) ‘Energy Sorghum—a genetic model for the design of C 4 grass bioenergy  
911 crops’, *Journal of Experimental Botany*, 65(13), pp. 3479–3489. doi: 10.1093/jxb/eru229.
- 912 Multani, D. S. *et al.* (2003) ‘Loss of an MDR transporter in compact stalks of maize br2 and  
913 sorghum dw3 mutants’, *Science*. Science, 302(5642), pp. 81–84. doi: 10.1126/science.1086072.
- 914 Murray, S. C. *et al.* (2008) ‘Genetic Improvement of Sorghum as a Biofuel Feedstock: I. QTL  
915 for Stem Sugar and Grain Nonstructural Carbohydrates’, *Crop Science*. John Wiley & Sons, Ltd,  
916 48(6), pp. 2165–2179. doi: 10.2135/cropsci2008.01.0016.
- 917 Napier, J. A. *et al.* (2014a) ‘Understanding and manipulating plant lipid composition: Metabolic  
918 engineering leads the way’, *Current Opinion in Plant Biology*. Elsevier Ltd, pp. 68–75. doi:  
919 10.1016/j.pbi.2014.04.001.



- 920 Napier, J. A. *et al.* (2014b) ‘Understanding and manipulating plant lipid composition: Metabolic  
921 engineering leads the way’, *Current Opinion in Plant Biology*. Elsevier Ltd, pp. 68–75. doi:  
922 10.1016/j.pbi.2014.04.001.
- 923 Nguyen, D. Q., Eamens, A. L. and Grof, C. P. L. (2018) ‘Reference gene identification for  
924 reliable normalisation of quantitative RT-PCR data in *Setaria viridis*’, *Plant Methods*. BioMed  
925 Central Ltd., 14(1). doi: 10.1186/s13007-018-0293-8.
- 926 O’Hagan, S. *et al.* (2018) ‘GeneGini: Assessment via the Gini Coefficient of Reference  
927 “Housekeeping” Genes and Diverse Human Transporter Expression Profiles’, *Cell Systems*. Cell  
928 Press, 6(2), pp. 230-244.e1. doi: 10.1016/J.CELS.2018.01.003.
- 929 O’Malley, R. C. *et al.* (2016) ‘Cistrome and Epicistrome Features Shape the Regulatory DNA  
930 Landscape’, *Cell*. Cell Press, 165(5), pp. 1280–1292. doi: 10.1016/j.cell.2016.04.038.
- 931 Obayashi, T. and Kinoshita, K. (no date) ‘Rank of Correlation Coefficient as a Comparable  
932 Measure for Biological Significance of Gene Coexpression’. doi: 10.1093/dnares/dsp016.
- 933 Olson, S. N. *et al.* (2012) ‘High biomass yield energy sorghum: developing a genetic model for  
934 C4 grass bioenergy crops’, *Biofuels, Bioproducts and Biorefining*. John Wiley & Sons, Ltd, 6(6),  
935 pp. 640–655. doi: 10.1002/bbb.1357.
- 936 Ottoline Leyser, H. M. and Furner, I. J. (1992) ‘Characterisation of three shoot apical meristem  
937 mutants of *Arabidopsis thaliana*’, *Development*, 116(2), pp. 397 LP – 403. Available at:  
938 <http://dev.biologists.org/content/116/2/397.abstract>.
- 939 P. Joshi, C. and Nookaraju, A. (2012) ‘New Avenues of Bioenergy Production from Plants:  
940 Green Alternatives to Petroleum’, *Journal of Petroleum & Environmental Biotechnology*.  
941 OMICS Publishing Group, 03(07). doi: 10.4172/2157-7463.1000134.
- 942 Papini-Terzi, F. S. *et al.* (2009) ‘Sugarcane genes associated with sucrose content’, *BMC*  
943 *Genomics*. BioMed Central, 10(1), p. 120. doi: 10.1186/1471-2164-10-120.
- 944 Para, A. *et al.* (2014) ‘Hit-and-run transcriptional control by bZIP1 mediates rapid nutrient  
945 signaling in *Arabidopsis*’, *Proceedings of the National Academy of Sciences of the United States*  
946 *of America*. National Academy of Sciences, 111(28), pp. 10371–10376. doi:  
947 10.1073/pnas.1404657111.

- 948 Parajuli, S. *et al.* (2020) ‘Towards oilcane: Engineering hyperaccumulation of triacylglycerol  
949 into sugarcane stems’, *GCB Bioenergy*. Wiley. doi: 10.1111/gcbb.12684.
- 950 Pauly, M. and Ramírez, V. (2018) ‘New insights into wall polysaccharide o-acetylation’,  
951 *Frontiers in Plant Science*. Frontiers Media S.A. doi: 10.3389/fpls.2018.01210.
- 952 *Picard Tools - By Broad Institute* (no date). Available at: <http://broadinstitute.github.io/picard/>  
953 (Accessed: 7 May 2020).
- 954 Qazi, H. A. *et al.* (2014) ‘Alterations in stem sugar content and metabolism in sorghum  
955 genotypes subjected to drought stress’, *Functional Plant Biology*. CSIRO PUBLISHING, 41(9),  
956 p. 954. doi: 10.1071/FP13299.
- 957 Qazi, H. A., Paranjpe, S. and Bhargava, S. (2012) ‘Stem sugar accumulation in sweet sorghum -  
958 Activity and expression of sucrose metabolizing enzymes and sucrose transporters’, *Journal of*  
959 *Plant Physiology*. *J Plant Physiol*, 169(6), pp. 605–613. doi: 10.1016/j.jplph.2012.01.005.
- 960 Rae, A. L. *et al.* (2009) ‘Functional specialization of vacuoles in sugarcane leaf and stem’,  
961 *Tropical Plant Biology*. Springer, 2(1), pp. 13–22. doi: 10.1007/s12042-008-9019-9.
- 962 Ramachandran, P., Carlsbecker, A. and Etchells, J. P. (2016) ‘Class III HD-ZIPs govern vascular  
963 cell fate: an HD view on patterning and differentiation’, *Journal of Experimental Botany*, 68(1),  
964 pp. 55–69. doi: 10.1093/jxb/erw370.
- 965 Ramšak, Ž. *et al.* (2018) ‘Network modeling unravels mechanisms of crosstalk between ethylene  
966 and salicylate signaling in potato’, *Plant Physiology*. American Society of Plant Biologists,  
967 178(1), pp. 488–499. doi: 10.1104/pp.18.00450.
- 968 Robinson, M. D., McCarthy, D. J. and Smyth, G. K. (2010) ‘edgeR: a Bioconductor package for  
969 differential expression analysis of digital gene expression data.’, *Bioinformatics (Oxford,*  
970 *England)*. Oxford University Press, 26(1), pp. 139–40. doi: 10.1093/bioinformatics/btp616.
- 971 Rooney, W. L. *et al.* (2007) ‘Designing sorghum as a dedicated bioenergy feedstock’, *Biofuels,*  
972 *Bioproducts and Biorefining*. John Wiley & Sons, Ltd, 1(2), pp. 147–157. doi: 10.1002/bbb.15.
- 973 Ruiz-Medrano, R. *et al.* (2011) ‘Vascular expression in Arabidopsis is predicted by the  
974 frequency of CT/GA-rich repeats in gene promoters’, *The Plant Journal*. John Wiley & Sons,

- 975 Ltd, 67(1), pp. 130–144. doi: 10.1111/j.1365-313X.2011.04581.x.
- 976 Ruonala, R., Ko, D. and Helariutta, Y. (2017) ‘Genetic Networks in Plant Vascular  
977 Development’, *Annual Review of Genetics*. Annual Reviews, 51(1), pp. 335–359. doi:  
978 10.1146/annurev-genet-120116-024525.
- 979 Ruuska, S. A. *et al.* (2006) ‘Genotypic variation in water-soluble carbohydrate accumulation in  
980 wheat’, *Functional Plant Biology*. CSIRO PUBLISHING, 33(9), p. 799. doi: 10.1071/FP06062.
- 981 Růžička, K. *et al.* (2015) ‘Xylem development - from the cradle to the grave’, *New Phytologist*.  
982 Blackwell Publishing Ltd, 207(3), pp. 519–535. doi: 10.1111/nph.13383.
- 983 De Rybel, B. *et al.* (2016) ‘Plant vascular development: From early specification to  
984 differentiation’, *Nature Reviews Molecular Cell Biology*. Nature Publishing Group, pp. 30–40.  
985 doi: 10.1038/nrm.2015.6.
- 986 Sae-Lim, P. *et al.* (2019) ‘Unraveling vascular development-related genes in laticifer-containing  
987 tissue of rubber tree by high-throughput transcriptome sequencing’, *Current Plant Biology*.  
988 Elsevier B.V., 19, p. 100112. doi: 10.1016/j.cpb.2019.100112.
- 989 Sage, R. F. and Zhu, X.-G. (2011) ‘Exploiting the engine of C<sub>4</sub> photosynthesis’, *Journal of*  
990 *Experimental Botany*, 62(9), pp. 2989–3000. doi: 10.1093/jxb/err179.
- 991 Sanchez, P., Nehlin, L. and Greb, T. (2012) ‘From thin to thick: Major transitions during stem  
992 development’, *Trends in Plant Science*. Elsevier Current Trends, pp. 113–121. doi:  
993 10.1016/j.tplants.2011.11.004.
- 994 Sanjaya *et al.* (2011) ‘Increasing the energy density of vegetative tissues by diverting carbon  
995 from starch to oil biosynthesis in transgenic *Arabidopsis*’, *Plant Biotechnology Journal*, 9(8), pp.  
996 874–883. doi: 10.1111/j.1467-7652.2011.00599.x.
- 997 Schnyder, H. (1993) ‘The role of carbohydrate storage and redistribution in the source-sink  
998 relations of wheat and barley during grain filling — a review’, *New Phytologist*, 123(2), pp. 233–  
999 245. doi: 10.1111/j.1469-8137.1993.tb03731.x.
- 1000 Schug, J. *et al.* (2005) ‘Promoter features related to tissue specificity as measured by Shannon  
1001 entropy’, *Genome Biology*. BioMed Central, 6(4), p. R33. doi: 10.1186/gb-2005-6-4-r33.

- 1002 Schürholz, A. K. *et al.* (2018) ‘A comprehensive toolkit for inducible, cell type-specific gene  
1003 expression in Arabidopsis’, *Plant Physiology*. American Society of Plant Biologists, 178(1), pp.  
1004 40–53. doi: 10.1104/pp.18.00463.
- 1005 Scofield, S., Dewitte, W. and Murray, J. A. H. (2007) ‘The KNOX gene SHOOT  
1006 MERISTEMLESS is required for the development of reproductive meristematic tissues in  
1007 Arabidopsis’, *The Plant Journal*. John Wiley & Sons, Ltd, 50(5), pp. 767–781. doi:  
1008 10.1111/j.1365-313X.2007.03095.x.
- 1009 Sekhon, R. S. *et al.* (2016) ‘Stover Composition in Maize and Sorghum Reveals Remarkable  
1010 Genetic Variation and Plasticity for Carbohydrate Accumulation’, *Frontiers in Plant Science*.  
1011 Frontiers Research Foundation, 7(June2016), p. 822. doi: 10.3389/fpls.2016.00822.
- 1012 Shi, D. *et al.* (2019) ‘STEM CELLS AND REGENERATION Bifacial cambium stem cells  
1013 generate xylem and phloem during radial plant growth’. doi: 10.1242/dev.171355.
- 1014 Shih, P. M. (2018) ‘Towards a sustainable bio-based economy: Redirecting primary metabolism  
1015 to new products with plant synthetic biology’, *Plant Science*. Elsevier Ireland Ltd, 273, pp. 84–  
1016 91. doi: 10.1016/j.plantsci.2018.03.012.
- 1017 Slewinski, T. L. (2012) ‘Non-structural carbohydrate partitioning in grass stems: a target to  
1018 increase yield stability, stress tolerance, and biofuel production’, *Journal of Experimental*  
1019 *Botany*, 63(13), pp. 4647–4670. doi: 10.1093/jxb/ers124.
- 1020 Slocombe, S. P. *et al.* (2009) ‘Oil accumulation in leaves directed by modification of fatty acid  
1021 breakdown and lipid synthesis pathways’, *Plant Biotechnology Journal*, 7(7), pp. 694–703. doi:  
1022 10.1111/j.1467-7652.2009.00435.x.
- 1023 Smith, A. D. *et al.* (2006) ‘DNA motifs in human and mouse proximal promoters predict tissue-  
1024 specific expression’, *Proceedings of the National Academy of Sciences*. National Academy of  
1025 Sciences, 103(16), pp. 6275–6280. doi: 10.1073/PNAS.0508169103.
- 1026 Stahle, M. I. *et al.* (2009a) ‘YABBYs and the transcriptional corepressors LEUNIG and  
1027 LEUNIG-HOMOLOG maintain leaf polarity and meristem activity in Arabidopsis’, *Plant Cell*.  
1028 American Society of Plant Biologists, 21(10), pp. 3105–3118. doi: 10.1105/tpc.109.070458.
- 1029 Stahle, M. I. *et al.* (2009b) ‘YABBYs and the transcriptional corepressors LEUNIG and

- 1030 LEUNIG-HOMOLOG maintain leaf polarity and meristem activity in Arabidopsis', *Plant Cell*.  
1031 American Society of Plant Biologists, 21(10), pp. 3105–3118. doi: 10.1105/tpc.109.070458.
- 1032 Sudhakar Reddy, P. *et al.* (2016) 'Evaluation of Sorghum [*Sorghum bicolor* (L.)] reference genes  
1033 in various tissues and under abiotic stress conditions for quantitative real-time PCR data  
1034 normalization', *Frontiers in Plant Science*. doi: 10.3389/fpls.2016.00529.
- 1035 Sundaram, V. and Wysocka, J. (2020) 'Transposable elements as a potent source of diverse cis-  
1036 regulatory sequences in mammalian genomes', *Philosophical Transactions of the Royal Society*  
1037 *B: Biological Sciences*. Royal Society Publishing. doi: 10.1098/rstb.2019.0347.
- 1038 Tarpley, L. and Vietor, D. M. (2007) 'Compartmentation of sucrose during radial transfer in  
1039 mature sorghum culm', *BMC Plant Biology*. BioMed Central, 7(1), p. 33. doi: 10.1186/1471-  
1040 2229-7-33.
- 1041 Thelen, J. J. and Ohlrogge, J. B. (2002) 'Metabolic Engineering of Fatty Acid Biosynthesis in  
1042 Plants', *Metabolic Engineering*. Academic Press Inc., 4(1), pp. 12–21. doi:  
1043 10.1006/mben.2001.0204.
- 1044 Toll-Riera, M. *et al.* (2008) 'Origin of Primate Orphan Genes: A Comparative Genomics  
1045 Approach'. doi: 10.1093/molbev/msn281.
- 1046 Trindade, L. M. *et al.* (2003) 'Isolation and functional characterization of a stolon specific  
1047 promoter from potato (*Solanum tuberosum* L.)', *Gene*. Elsevier, 303(1–2), pp. 77–87. doi:  
1048 10.1016/S0378-1119(02)01147-2.
- 1049 Uhlen, M. *et al.* (2015) 'Tissue-based map of the human proteome', *Science*. American  
1050 Association for the Advancement of Science, 347(6220), pp. 1260419–1260419. doi:  
1051 10.1126/science.1260419.
- 1052 Vanhercke, T. *et al.* (2013) 'Synergistic effect of WRI1 and DGAT1 coexpression on  
1053 triacylglycerol biosynthesis in plants', *FEBS Letters*. FEBS Lett, 587(4), pp. 364–369. doi:  
1054 10.1016/j.febslet.2012.12.018.
- 1055 Vanhercke, T. *et al.* (2014) 'Metabolic engineering of biomass for high energy density: Oilseed-  
1056 like triacylglycerol yields from plant leaves', *Plant Biotechnology Journal*, 12(2), pp. 231–239.  
1057 doi: 10.1111/pbi.12131.

- 1058 Vanhercke, T. *et al.* (2019) ‘Up-regulation of lipid biosynthesis increases the oil content in  
1059 leaves of *Sorghum bicolor*’, *Plant Biotechnology Journal*. Blackwell Publishing Ltd, 17(1), pp.  
1060 220–232. doi: 10.1111/pbi.12959.
- 1061 Varvel, G. E. *et al.* (2008) ‘Comparison of Corn and Switchgrass on Marginal Soils for  
1062 Comparison of Corn and Switchgrass on Marginal Soils for Bioenergy Bioenergy’. doi:  
1063 10.1016/j.biombioe.2007.07.003.
- 1064 Venglat, S. P. *et al.* (2002) ‘The homeobox gene *brevipedicellus* is a key regulator of  
1065 inflorescence architecture in *Arabidopsis*’, *Proceedings of the National Academy of Sciences of*  
1066 *the United States of America*, 99(7), pp. 4730–4735. doi: 10.1073/pnas.072626099.
- 1067 Waclawovsky, A. J. *et al.* (2010a) ‘Sugarcane for bioenergy production: an assessment of yield  
1068 and regulation of sucrose content’, *Plant Biotechnology Journal*. John Wiley & Sons, Ltd, 8(3),  
1069 pp. 263–276. doi: 10.1111/j.1467-7652.2009.00491.x.
- 1070 Waclawovsky, A. J. *et al.* (2010b) ‘Sugarcane for bioenergy production: An assessment of yield  
1071 and regulation of sucrose content’, *Plant Biotechnology Journal*. Plant Biotechnol J, pp. 263–  
1072 276. doi: 10.1111/j.1467-7652.2009.00491.x.
- 1073 Walsh, K. B., Sky, R. C. and Brown, S. M. (2005) ‘The anatomy of the pathway of sucrose  
1074 unloading within the sugarcane stalk’, *Functional Plant Biology*. CSIRO PUBLISHING, 32(4),  
1075 p. 367. doi: 10.1071/FP04102.
- 1076 Wang, H. *et al.* (2007) ‘Developmental control of *Arabidopsis* seed oil biosynthesis’, *Planta*.  
1077 *Planta*, 226(3), pp. 773–783. doi: 10.1007/s00425-007-0524-0.
- 1078 Wang, H. *et al.* (2017) ‘Isolation and characterization of a novel pollen-specific promoter in  
1079 maize (*Zea mays* L.)’, *Genome*. Canadian Science Publishing, 60(6), pp. 485–495. doi:  
1080 10.1139/gen-2016-0089.
- 1081 Wang, W. C. (2016) ‘Techno-economic analysis of a bio-refinery process for producing Hydro-  
1082 processed Renewable Jet fuel from *Jatropha*’, *Renewable Energy*. Elsevier Ltd, 95, pp. 63–73.  
1083 doi: 10.1016/j.renene.2016.03.107.
- 1084 Weselake, R. J. (2016a) ‘Engineering oil accumulation in vegetative tissue’, in *Industrial Oil*  
1085 *Crops*. Elsevier Inc., pp. 413–434. doi: 10.1016/B978-1-893997-98-1.00015-4.



- 1086 Weselake, R. J. (2016b) ‘Engineering Oil Accumulation in Vegetative Tissue’, in *Industrial Oil*  
1087 *Crops*. Elsevier, pp. 413–434. doi: 10.1016/B978-1-893997-98-1.00015-4.
- 1088 Wu, D. D., Irwin, D. M. and Zhang, Y. P. (2011) ‘De novo origin of human protein-coding  
1089 genes’, *PLoS Genetics*, 7(11). doi: 10.1371/journal.pgen.1002379.
- 1090 Xiao, S. J. *et al.* (2010) ‘TiSGeD: a database for tissue-specific genes’, *Bioinformatics*. Narnia,  
1091 26(9), pp. 1273–1275. doi: 10.1093/bioinformatics/btq109.
- 1092 Xiong, G., Cheng, K. and Pauly, M. (2013) ‘Xylan O-Acetylation Impacts Xylem Development  
1093 and Enzymatic Recalcitrance as Indicated by the Arabidopsis Mutant tbl29’. doi:  
1094 10.1093/mp/sst014.
- 1095 Xu, C. and Shanklin, J. (2016) ‘Triacylglycerol Metabolism, Function, and Accumulation in  
1096 Plant Vegetative Tissues’, *Annual Review of Plant Biology*. Annual Reviews, 67(1), pp. 179–  
1097 206. doi: 10.1146/annurev-arplant-043015-111641.
- 1098 Xu, Xuan *et al.* (2019) ‘Cell wall composition and transcriptomics in stem tissues of stinging  
1099 nettle (*Urtica dioica* L.): Spotlight on a neglected fibre crop’, *Plant Direct*. John Wiley and  
1100 Sons Inc., 3(8), p. e00151. doi: 10.1002/pld3.151.
- 1101 Xu, Xiaoyu *et al.* (2019) ‘Upregulated Lipid Biosynthesis at the Expense of Starch Production in  
1102 Potato (*Solanum tuberosum*) Vegetative Tissues via Simultaneous Downregulation of ADP-  
1103 Glucose Pyrophosphorylase and Sugar Dependent1 Expressions’, *Frontiers in Plant Science*.  
1104 Frontiers Media S.A., 10. doi: 10.3389/fpls.2019.01444.
- 1105 Xu, X. Y. *et al.* (2020) ‘A Synergistic Genetic Engineering Strategy Induced Triacylglycerol  
1106 Accumulation in Potato (*Solanum tuberosum*) Leaf’, *Frontiers in Plant Science*. Frontiers Media  
1107 S.A., 11. doi: 10.3389/fpls.2020.00215.
- 1108 Yanai, I. *et al.* (2005) ‘Genome-wide midrange transcription profiles reveal expression level  
1109 relationships in human tissue specification’, *Bioinformatics*. Narnia, 21(5), pp. 650–659. doi:  
1110 10.1093/bioinformatics/bti042.
- 1111 Yang, J. H. and Wang, H. (2016) ‘Molecular mechanisms for vascular development and  
1112 secondary cell wall formation’, *Frontiers in Plant Science*. Frontiers Media S.A. doi:  
1113 10.3389/fpls.2016.00356.

- 1114 Yang, L. *et al.* (2016) ‘PtrWRKY19, a novel WRKY transcription factor, contributes to the  
1115 regulation of pith secondary wall formation in *Populus trichocarpa*’, *Scientific Reports*. Nature  
1116 Publishing Group, 6(1), pp. 1–12. doi: 10.1038/srep18643.
- 1117 Yang, Y. *et al.* (2015) ‘Ectopic expression of WRINKLED1 affects fatty acid homeostasis in  
1118 *Brachypodium distachyon* vegetative tissues’, *Plant Physiology*. American Society of Plant  
1119 Biologists, 169(3), pp. 1836–1847. doi: 10.1104/pp.15.01236.
- 1120 Ye, K. *et al.* (2009) ‘Pindel: a pattern growth approach to detect break points of large deletions  
1121 and medium sized insertions from paired-end short reads’, 25(21), pp. 2865–2871. doi:  
1122 10.1093/bioinformatics/btp394.
- 1123 Ye, Z.-H. (2002) ‘VASCULAR TISSUE DIFFERENTIATION AND PATTERN F  
1124 ORMATION IN PLANTS’, *Annual Review of Plant Biology*. Annual Reviews, 53(1), pp. 183–  
1125 202. doi: 10.1146/annurev.arplant.53.100301.135245.
- 1126 YH, L. and SR, J. (2003) ‘[Vascular-specific promoters and cis-regulatory elements].’, *Sheng wu*  
1127 *Gong Cheng xue bao = Chinese Journal of Biotechnology*, 19(2), pp. 131–135.
- 1128 Yu, X. *et al.* (2006) ‘Computational analysis of tissue-specific combinatorial gene regulation:  
1129 predicting interaction between transcription factors in human tissues’, *Nucleic Acids Research*.  
1130 Narnia, 34(17), pp. 4925–4936. doi: 10.1093/nar/gkl595.
- 1131 Zale, J. *et al.* (2016) ‘Metabolic engineering of sugarcane to accumulate energy-dense  
1132 triacylglycerols in vegetative biomass’, *Plant Biotechnology Journal*. Blackwell Publishing Ltd,  
1133 14(2), pp. 661–669. doi: 10.1111/pbi.12411.
- 1134 Zhang, L. *et al.* (2010) ‘Altered xylem-phloem transfer of amino acids affects metabolism and  
1135 leads to increased seed yield and oil content in *Arabidopsis*’, *Plant Cell*. American Society of  
1136 Plant Biologists, 22(11), pp. 3603–3620. doi: 10.1105/tpc.110.073833.
- 1137 Zhang, L. *et al.* (2014) ‘Cloning and characterization of a novel *Athspr* promoter specifically  
1138 active in vascular tissue’, *Plant Physiology and Biochemistry*. Elsevier Masson, 78, pp. 88–96.  
1139 doi: 10.1016/j.plaphy.2014.02.019.
- 1140 Zhang, Z. and Zhang, X. (2012) ‘Argonautes compete for miR165/166 to regulate shoot apical  
1141 meristem development’, *Current Opinion in Plant Biology*. NIH Public Access, 15(6), pp. 652–

1142 658. doi: 10.1016/j.pbi.2012.05.007.

1143 Zhong, R. *et al.* (2008) ‘A battery of transcription factors involved in the regulation of secondary  
1144 cell wall biosynthesis in Arabidopsis’, *Plant Cell*, 20(10), pp. 2763–2782. doi:

1145 10.1105/tpc.108.061325.

1146 Zhou, J., Sebastian, J. and Lee, J.-Y. (2011) ‘Signaling and gene regulatory programs in plant  
1147 vascular stem cells’, *genesis*. John Wiley & Sons, Ltd, 49(12), pp. 885–904. doi:

1148 10.1002/dvg.20795.

1149 Zhu, Y. *et al.* (2013) ‘PtrHB7, a class III HD-Zip Gene, Plays a Critical Role in Regulation of  
1150 Vascular Cambium Differentiation in Populus’, *Molecular Plant*, 6(4), pp. 1331–1343. doi:

1151 <https://doi.org/10.1093/mp/sss164>.

1152

## Tables

**Table 1: The information of tissues sampled by development stage used in the transcriptome dataset used in this analysis from [McCormick et al., 2018].**

| Tissue Type             | Stage             | Time of sample | Tissue Description                                                                                                       | Sample ID                      |
|-------------------------|-------------------|----------------|--------------------------------------------------------------------------------------------------------------------------|--------------------------------|
| Leaves                  | Juvenile          | DAE 8          | Leaf blade of first emerged leaf                                                                                         | leaf.blade.juv                 |
|                         |                   |                | Lower portion (proximal) of third emerging leaf blade (in whorl)                                                         | leaf.lower.juv                 |
|                         |                   |                | Upper portion (distal) of third emerging leaf blade                                                                      | leaf.upper.juv                 |
| Roots                   |                   |                | Central section of roots                                                                                                 | root_bottom.juv                |
|                         |                   |                | Distal 1cm of root tips                                                                                                  | root_top.juv                   |
| Stem                    |                   |                | Entire stem (approximately 2mm in size)                                                                                  | stem_2mm.juv                   |
| Leaves                  | Vegetative        | DAE 24         | Lower portion (proximal) of shoot, including sheaths, after removing first through fourth emerged leaves                 | leaf_lower_whorl.veg           |
|                         |                   |                | Middle portion of shoot after removing first through fourth emerged leaves                                               | leaf_middle_whorl.veg          |
|                         |                   |                | Upper portion (distal) of shoot, including leaves emerged from whorl, after removing first through fourth emerged leaves | leaf_upper_whorl.veg           |
| Roots                   |                   |                | Central section of roots                                                                                                 | root_bottom.veg                |
|                         |                   |                | Distal 1cm of root tips                                                                                                  | root_top.veg                   |
| Stem                    |                   |                | Entire stem (approximately 1cm in size)                                                                                  | stem_1cm.veg                   |
| Leaves                  | Floral initiation | DAE 44         | Leaf sheath of last fully emerged (ligulated) leaf                                                                       | leaf_sheath_growing.floral     |
|                         |                   |                | Lower portion (proximal) of leaf blade of last fully emerged leaf (ligulated)                                            | leaf_lower_growing.floral      |
|                         |                   |                | Upper portion (proximal) of leaf blade of last fully emerged leaf (ligulated)                                            | leaf_upper_growing.floral      |
| Roots                   |                   |                | Central section of roots                                                                                                 | root_middle.floral             |
|                         |                   |                | Distal 1cm of root tips                                                                                                  | root_bottom.floral             |
| Stem                    |                   |                | Mature internode from middle of stem                                                                                     | internode_mature.floral        |
|                         |                   |                | 2cm long growing internode near apex (further from apex than 1cm growing internode)                                      | internode_growing.floral       |
|                         |                   |                | 1cm long growing internode near apex (closer to apex than 2cm growing internode)                                         | internode_growing_upper.floral |
| Reproductive Structures |                   |                | Region of developing panicle in apex                                                                                     | panicle.floral                 |
|                         |                   |                | Region of developing peduncle in apex                                                                                    | peduncle.floral                |
| Leaves                  | Anthesis          | DAE 65         | Leaf sheath of leaf below flag leaf                                                                                      | leaf_sheath_growing.anth       |
|                         |                   |                | Lower portion (proximal) of leaf blade of leaf below flag leaf                                                           | leaf_lower_growing.anth        |
|                         |                   |                | Upper portion (distal) of leaf blade of leaf below flag leaf                                                             | leaf_upper_growing.anth        |
| Roots                   |                   |                | Central section of roots                                                                                                 | root_bottom.anth               |
| Stem                    |                   |                | Mature internode from middle of stem                                                                                     | stem_mid_internode.anth        |
|                         |                   |                | Mature internode immediately below peduncle                                                                              | Internode_flagleaf.anth        |
| Reproductive Structures |                   |                | Lower (proximal) half of panicle                                                                                         | panicle_lower.anth             |
|                         |                   |                | Upper (distal) half of panicle                                                                                           | panicle_upper.anth             |
| Leaves                  | Grain maturity    | DAE 96         | Leaf sheath of flag leaf                                                                                                 | leaf_sheath_growing.grain      |
|                         |                   |                | Lower portion (proximal) of flag leaf blade                                                                              | leaf_lower_growing.grain       |
| Roots                   |                   |                | Central section of roots                                                                                                 | root_bottom.grain              |
| Stem                    |                   |                | Mature internode from middle of stem                                                                                     | Stem_mid_internode.grain       |
|                         |                   |                | Mature internode immediately below peduncle                                                                              | Internode_flagleaf.grain       |
| Reproductive Structures |                   |                | Mature, dormant, dry seed                                                                                                | Seed_dry.grain                 |
|                         |                   |                | Developing seed, imbibed overnight                                                                                       | Seed_imbibed.grain             |

**Table 2: Stem-related cellular functions of identified stem-specific and stem-preferred genes.**

| Gene ID                              | TF Family     | Ath Ortholog  | Function                                                                                                                                                                                                                                                     | [Ref.]                                                                                                                                                                                                                     |
|--------------------------------------|---------------|---------------|--------------------------------------------------------------------------------------------------------------------------------------------------------------------------------------------------------------------------------------------------------------|----------------------------------------------------------------------------------------------------------------------------------------------------------------------------------------------------------------------------|
| <i>AOSS</i>                          |               |               |                                                                                                                                                                                                                                                              |                                                                                                                                                                                                                            |
| Sobic.001G106200<br>Sobic.001G106000 | <i>TALE</i>   | <i>KNAT1</i>  | Meristem maintenance through cell-to-cell communication, regulates internode development                                                                                                                                                                     | (Byrne, Simorowski and Martienssen, 2002; Douglas <i>et al.</i> , 2002; Venglat <i>et al.</i> , 2002; Scofield, Dewitte and Murray, 2007; Helizon <i>et al.</i> , 2014b; Gao <i>et al.</i> , 2015; Kehr and Kragler, 2018) |
| <i>TSSE</i>                          |               |               |                                                                                                                                                                                                                                                              |                                                                                                                                                                                                                            |
| Sobic.001G075101                     | <i>TALE</i>   | <i>KNAT1</i>  | Meristem maintenance through cell-to-cell communication, regulates internode development                                                                                                                                                                     | et al. 2015; Venglat et al. 2002; Byrne, Simorowski, and Martienssen 2002; Helizon et al. 2014; Kehr and Kragler 2018)                                                                                                     |
| Sobic.001G199200                     | <i>YABBY</i>  | <i>YAB1</i>   | Expressed in primordia of all lateral organs and act to define the organ primordia domain and stimulate signals necessary for the dynamic partitioning of SAMs                                                                                               | (Goldshmidt <i>et al.</i> , 2008b; Stahle <i>et al.</i> , 2009b)                                                                                                                                                           |
| Sobic.001G286700                     | <i>HD-ZIP</i> | <i>HB7</i>    | preferentially expressed in cambial zone. Suppression of HB7 in poplar displayed significant reduction in xylem but increase in phloem and overexpression enhanced differentiation of cambial cells toward xylem cells but inhibited phloem differentiation. | (Zhu <i>et al.</i> , 2013; Ramachandran, Carlsbecker and Etchells, 2016)                                                                                                                                                   |
| Sobic.005G018900                     | -             | <i>PLC2</i>   | Phospholipase C2 is required during the early stages of xylem differentiation, as indicated by the reduction of differentiated xylem cells upon application of PLC inhibitors                                                                                | (Kanehara <i>et al.</i> , 2015; Gujas and Rodriguez-Villalon, 2016)                                                                                                                                                        |
| Sobic.007G183200                     | <i>bHLH</i>   | <i>MYC2</i>   | JA-mediated xylem development, promotes cambial activities                                                                                                                                                                                                   | (Miyashima <i>et al.</i> , 2013; Jang <i>et al.</i> , 2017; Sae-Lim <i>et al.</i> , 2019)                                                                                                                                  |
| Sobic.008G151600                     |               | <i>TBL29</i>  | trichome birefringence-like (TBL29) mutant phenotype in Arabidopsis had collapsed xylem and reduced plant growth                                                                                                                                             | (Xiong, Cheng and Pauly, 2013; Bensussan <i>et al.</i> , 2015; Pauly and Ramirez, 2018; Xuan Xu <i>et al.</i> , 2019)                                                                                                      |
| Sobic.009G189900                     |               | <i>CLV3</i>   | suppression of stem cell proliferation in the meristem and Excess CLV3 promote differentiation from stem cells                                                                                                                                               | (Ito <i>et al.</i> , 2006; Hirakawa <i>et al.</i> , 2008; Kondo <i>et al.</i> , 2011; Růžička <i>et al.</i> , 2015)                                                                                                        |
| Sobic.004G298400                     | <i>WRKY</i>   | <i>WRKY12</i> | WRKY12 negatively regulate the expression of NST2, which acts as master regulators play a critical role in switching on and off secondary wall biosynthesis and represses cell wall biosynthetic genes in pith cells                                         | (Sanchez, Nehlin and Greb, 2012; Gallego-Giraldo <i>et al.</i> , 2016; Yang and Wang, 2016; Yang <i>et al.</i> , 2016)                                                                                                     |
| <i>TSSL</i>                          |               |               |                                                                                                                                                                                                                                                              |                                                                                                                                                                                                                            |
| Sobic.002G299200                     |               | <i>AGO1</i>   | AGO1 is required for the function of most miRNAs including miR165/166 to repress the HD-ZIP TFs such as PHB, PHV, REV related to developmental regulators required for SAM establishment, vascular development                                               | (Kidner and Martienssen, 2005; Mallory <i>et al.</i> , 2009; Zhang and Zhang, 2012)                                                                                                                                        |
| Sobic.006G166300                     | <i>WRKY</i>   | <i>WRKY12</i> | WRKY12 negatively regulate the expression of NST2, which acts as master regulators play a critical role in switching on and off secondary wall biosynthesis and represses cell wall biosynthetic genes in pith cells                                         | (Sanchez, Nehlin and Greb, 2012; Gallego-Giraldo <i>et al.</i> , 2016; Yang and Wang, 2016; Yang <i>et al.</i> , 2016)                                                                                                     |

**Table 3: Network characteristics in the Sorghum BTx623 spatial-temporal stem-preferred gene regulatory network.** To characterize the topology of the stem-preferred gene's temporal GRNs, each network's topological characteristics were computed by NetworkAnalyzer in Cytoscape.

| <b>AOSS</b>                                            |          |            |                   |          |                |
|--------------------------------------------------------|----------|------------|-------------------|----------|----------------|
|                                                        | Juvenile | Vegetative | Floral Initiation | Anthesis | Grain Maturity |
| Total No. of genes in the network<br>(stem genes + TF) | 7+751    | 7+731      | 8+871             | 751+8    | 8+724          |
| Total No. of regulatory edges                          |          |            |                   |          |                |
| Median no. of connections per gene                     |          |            |                   |          |                |
| In-Degree                                              | 6        | 4          | 28                | 14       | 12             |
| Out-Degree                                             | 5        | 4          | 21                | 15       | 11             |
| Shortest path length                                   | 13.4     | 16.6       | 3.7               | 4.5      | 4.7            |
| Clustering coefficient                                 | 0.306    | 0.292      | 0.215             | 0.234    | 0.225          |
| Connectivity of out-node distribution                  |          |            |                   |          |                |
| Degree exponent                                        | 0.182    | 0.082      | 0.248             | 0.211    | 0.217          |
| R=Squared                                              | 0.661    | 0.203      | 0.679             | 0.653    | 0.653          |
| <b>TSS-Early</b>                                       |          |            |                   |          |                |
| Total No. of genes in the network<br>(stem genes + TF) | 42+779   | 38+740     | 38+875            | 15+751   | 13+724         |
| Total No. of regulatory edges                          |          |            |                   |          |                |
| Median no. of connections per gene                     |          |            |                   |          |                |
| In-Degree                                              | 6        | 4          | 29                | 14       | 12             |
| Out-Degree                                             | 5        | 4          | 20                | 15       | 11             |
| Shortest path length                                   | 13.4     | 16.8       | 3.7               | 4.5      | 4.7            |
| Clustering coefficient                                 | 0.305    | 0.285      | 0.211             | 0.233    | 0.223          |
| Connectivity of out-node distribution                  |          |            |                   |          |                |
| Degree exponent                                        | 0.169    | 0.092      | 0.252             | 0.204    | 0.237          |
| R=Squared                                              | 0.653    | 0.392      | 0.675             | 0.589    | 0.711          |
| <b>TSS-Late</b>                                        |          |            |                   |          |                |
| Total No. of genes in the network<br>(stem genes + TF) | 2+460    | 3+729      | 4+870             | 4+750    | 5+723          |
| Median no. of connections per gene                     |          |            |                   |          |                |
| In-Degree                                              | 6        | 4          | 29                | 14       | 12             |
| Out-Degree                                             | 5        | 4          | 21                | 14       | 11             |
| Clustering coefficient                                 | 0.290    | 0.291      | 0.214             | 0.233    | 0.225          |
| Connectivity of out-node distribution                  |          |            |                   |          |                |
| Degree exponent                                        | 0.230    | 0.071      | 0.245             | 0.215    | 0.221          |
| R=Squared                                              | 0.629    | 0.150      | 0.674             | 0.649    | 0.686          |



**Table 4:A table of SNVs and SVs within cis-regulatory elements in 1.5 Kbp upstream non-coding region of stem-specific genes with significant genetic alterations.**

| GENE_ID         | CHR   | POS      | REF                  | ALT              | TYPE | CRE Family        |
|-----------------|-------|----------|----------------------|------------------|------|-------------------|
| Sobic.001G10600 | Chr01 | 8142554  | A                    | G                | SNV  | NAC, TBP          |
|                 |       | 8142824  | T                    | C                | SNV  | SBP               |
|                 |       | 8142859  | T                    | C                | SNV  | AT-Hook           |
|                 |       | 8142864  | T                    | C                | SNV  | GATA, ARR-B       |
|                 |       | 8142891  | C                    | G                | SNV  | bZIP              |
| Sobic.001G10620 | Chr01 | 8178898  | TAAAAAAAA<br>A       | TAAAAAAAAAA<br>A | INS  | AT-Hook, C2H2     |
|                 |       | 8179306  | A                    | G                | SNV  | AT-Hook           |
|                 |       | 8179602  | T                    | G                | SNV  | AT-Hook           |
|                 |       | 8179836  | G                    | T                | SNV  | MADS Box, AT-Hook |
|                 |       | 8179837  | T                    | G                | SNV  | MADS Box, AT-Hook |
| Sobic.006G14750 | Chr06 | 50913596 | GTTT                 | GTT              | DEL  | C2H2              |
|                 |       | 50913790 | TAA                  | TAAA             | INS  | ZF-HD             |
|                 |       | 50914371 | A                    | C                | SNV  | GATA              |
|                 |       | 50914827 | A                    | G                | SNV  | MADS Box          |
| Sobic.002G41950 | Chr02 | 76700088 | GTTTTTTT             | GTTTTTTT         | INS  | SBP, AP2          |
|                 |       | 76700683 | CTAT                 | CTATTAT          | INS  | WRKY              |
|                 |       | 76700882 | C                    | G                | SNV  | ERF, bHLH         |
|                 |       | 76700897 | GGCGCGCG<br>CGCGCGCG | GGCGCGCG         | DEL  | E2F/DP            |

**Table 5: Genetic alterations within cis-regulatory elements in 1.5 Kbp upstream non-coding region between Della and BTx623 cultivars for predicted regulatory TFs of Sobic.006G024800 during a) Early stage and b) Late stage.**

| GENE_ID          | CHR   | POS      | REF                                                                                | ALT                                                                                       | TYPE | CRE Family         |
|------------------|-------|----------|------------------------------------------------------------------------------------|-------------------------------------------------------------------------------------------|------|--------------------|
| Sobic.001G513700 | Chr01 | 78104570 | CAAAAAAAAAA                                                                        | CAAAAAAAAAA                                                                               | DEL  | RAV, MADS Box      |
|                  |       | 78104813 | ATATTCTTCGT                                                                        | AT                                                                                        | DEL  | G2-like            |
|                  |       | 78105411 | CGTAGTGTAGTGTA<br>GTGTAGTGTAG                                                      | CGTAGTGTAGTGTAG<br>TGTAGTGTAGTGTAG                                                        | INS  | ERF, C2H2          |
| Sobic.002G225100 | Chr02 | 61694212 | ATTTTT                                                                             | ATTTTTT                                                                                   | INS  | AT-Hook            |
|                  |       | 61694222 | C                                                                                  | T                                                                                         | SNV  | TALE               |
|                  |       | 61694225 | A                                                                                  | G                                                                                         | SNV  | TALE               |
|                  |       | 61694217 | T                                                                                  | <RPL>                                                                                     | RPL  | TALE               |
|                  |       | 61694876 | C                                                                                  | A                                                                                         | SNV  | bZIP, bHLH         |
|                  |       | 61694888 | G                                                                                  | A                                                                                         | SNV  | bZIP, bHLH         |
|                  |       | 61694950 | T                                                                                  | G                                                                                         | SNV  | bZIP               |
|                  |       | 61695090 | C                                                                                  | G                                                                                         | SNV  | bZIP               |
|                  |       | 61695217 | AAGGAGGAGGA                                                                        | AAGGAGGAGGAGGA<br>GGAGGAGGAGGAGG<br>AGGA                                                  | INS  | bHLH, bZIP         |
| Sobic.008G164800 | Chr08 | 59819801 | A                                                                                  | ATATAT                                                                                    | INS  | TBP, bZIP, AT-Hook |
|                  |       | 59819807 | TTCAGGGAAATTTCC<br>TTGTGGTGCCATATA<br>TATGTGGAGATGGA<br>GAGAGCTGTGAACA<br>ACACATTG | TATATTTTCAGGGAAA<br>TTTCCTTGTGGTGCC<br>ATATATATGTGGAGA<br>TGGAGAGAGCTGTGA<br>ACAACACATTGT | RPL  | TBP, AT-Hook       |
|                  |       | 59820200 | ACTTGTGAAAAGAA<br>ACTGAAATACAGAG<br>AGAT                                           | AGACTTGTGAAAAGA<br>AACTGAAATAGAGA<br>GAGATAGAGAGCAG<br>GCTGAG                             | RPL  | bZIP               |
|                  |       | 59819801 | ATATATT                                                                            | ATATATTATATT                                                                              | INS  | TBP, AT-Hook       |

## Figure Legends

**Figure 1:** Clustering of tissues.

**Figure 2:** Global gene expression of stem-specific genes across stem and non-stem tissues through all developmental stages.

**Figure 3:** A set of GO terms enriched in AOSS, TSS-Early, and TSS-Late stem-preferred genes.

**Figure 4:** A set of unique cis-element motifs enriched in AOSS, TSS-Early, and TSS-Late gene promoters.

**Figure 5:** Temporal gene regulatory network of a) AOSS, b) TSSE, c) TSSL genes through five developmental stages in BTx623 sorghum.

**Figure 6:** Temporal gene regulatory network of AOSS genes through development in BTx623 and Della cultivars.

**Figure 1:** Temporal gene regulatory network of TSSE genes through development in BTx623 and Della cultivars.

**Figure 8:** Temporal gene regulatory network of TSSL genes through development in BTx623 and Della cultivars.

**Figure 9:** Predicted gene regulatory networks of Sobic.006G26300 (one of most stem-specific and highly expressed gene) for BTx623 and Della for comparable time points.

**Figure 10:** Predicted regulatory TFs of Sobic.006G024800 during a) Early stage and b) Late stage. The regulatory interactions shown here are predicted at PCC & MR  $\geq 0.9$ .

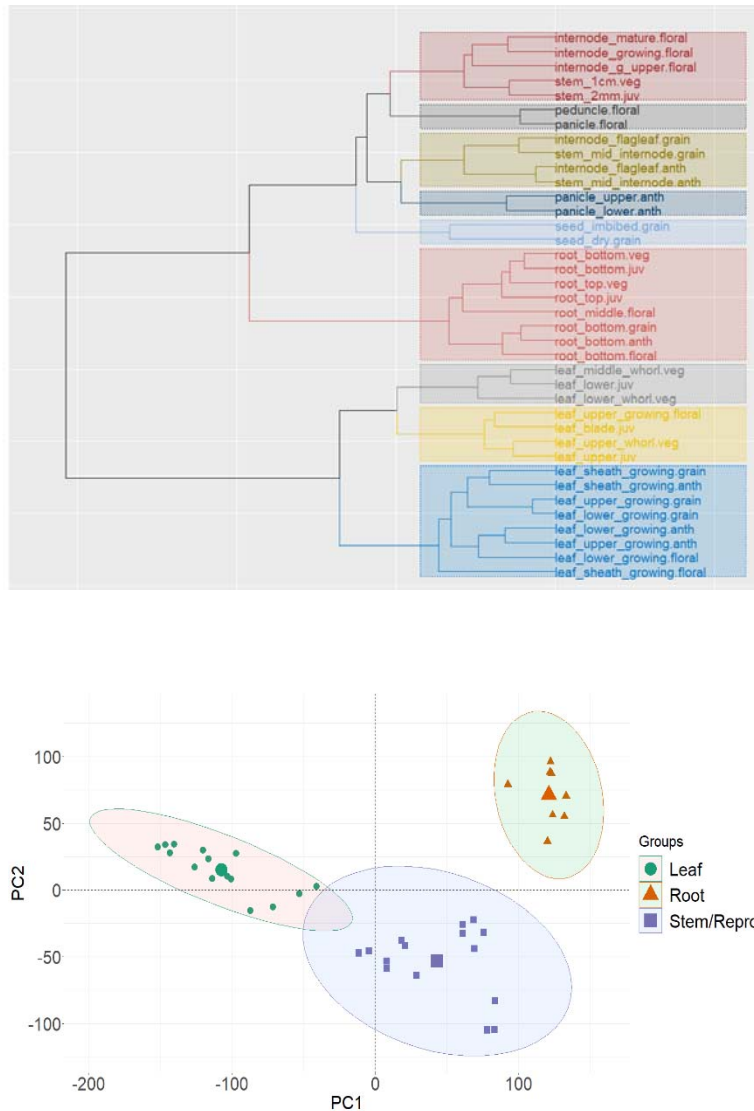

**Figure 1: Clustering of tissues.** A) Hierarchical Clustering analysis of the 38 tissue samples based on the expression of 23,674 genes (expressed in at least one sample,  $TPM \geq 5$ ). B) First two principal components of the spatial-temporal samples colored based on 4 major tissue types using expression values of all genes.

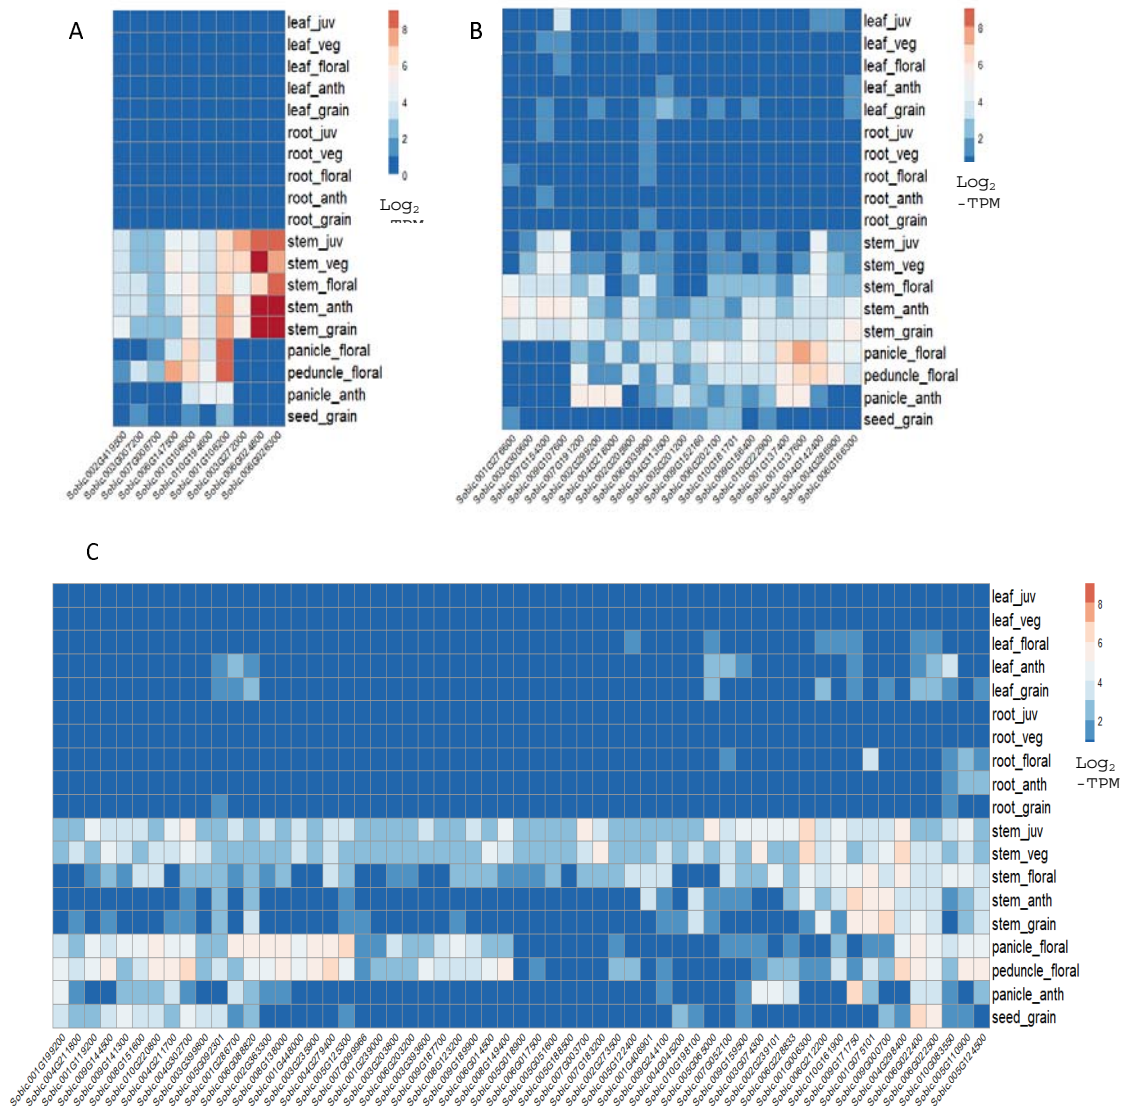

**Figure 2: Global gene expression of stem-specific genes across stem and non-stem tissues through all developmental stages.** A) Gene expression profile of 10 AOSS (Always-On-Stem-Specific) genes, B) Gene expression profile of 59 TSS-Early (Temporal stem-specificity during Early development), B) Gene expression profile of 21 TSS-Late (Temporal Stem-Specificity during Late development). Each row represents the mean gene expression values/ quantile normalized  $\text{log}_2$ -TPM values. The mean expression values for each gene in each stage are represented by the intensity of color (blue representing no expression and orange representing maximum expression).

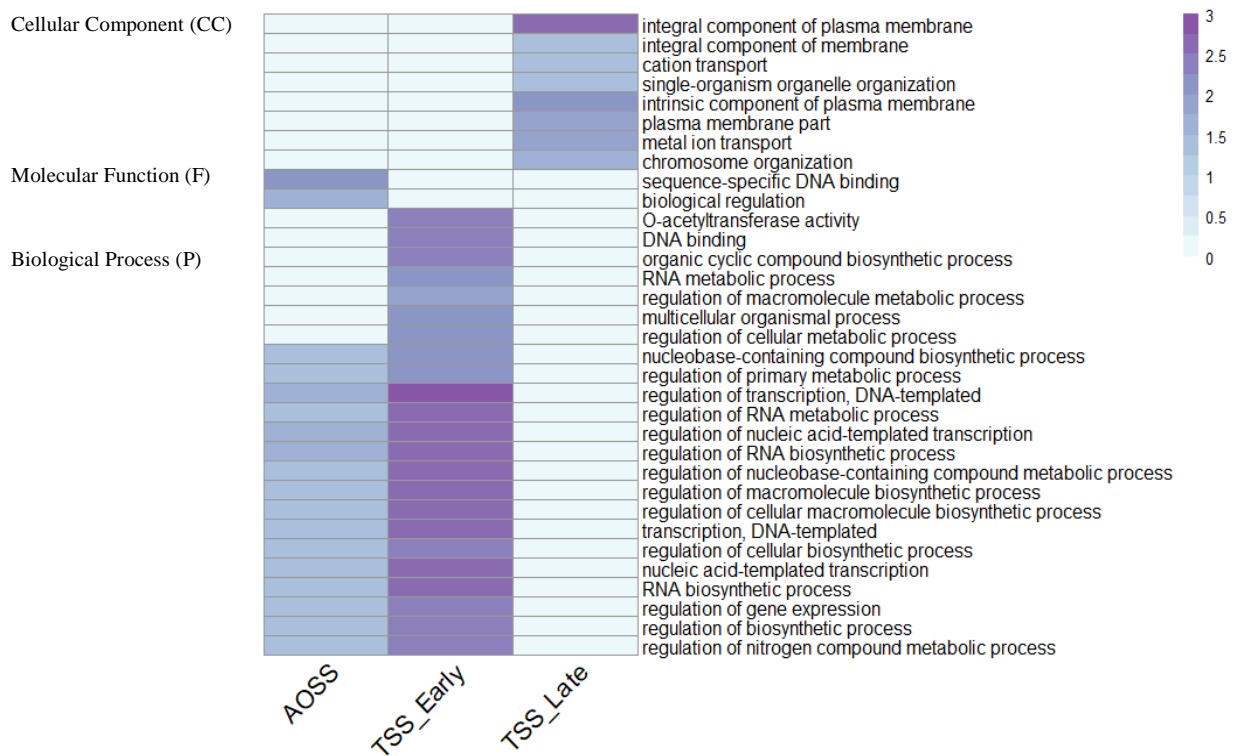

**Figure 3: A set of GO terms enriched in AOSS, TSS-Early, and TSS-Late stem-preferred genes.** A) Biological Processed GO Terms. B) Molecular Function and Cellular Component GO Terms. Significantly enriched GO terms are selected based on p-value < 0.05.



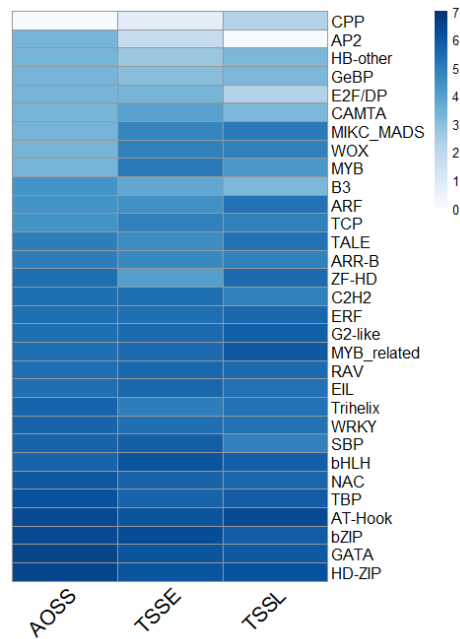

**Figure 4: A set of unique cis-element motifs enriched in AOSS, TSS-Early, and TSS-Late gene promoters.** The enrichment of cis-element motifs is identified based on over-representation of CREs in the 1.5 kb upstream promoters of stem-preferred genes, comparing to the whole genome (fold change > 1.1). The color intensity in the heatmap refers to percentage of stem-preferred sequences with enriched CRE.

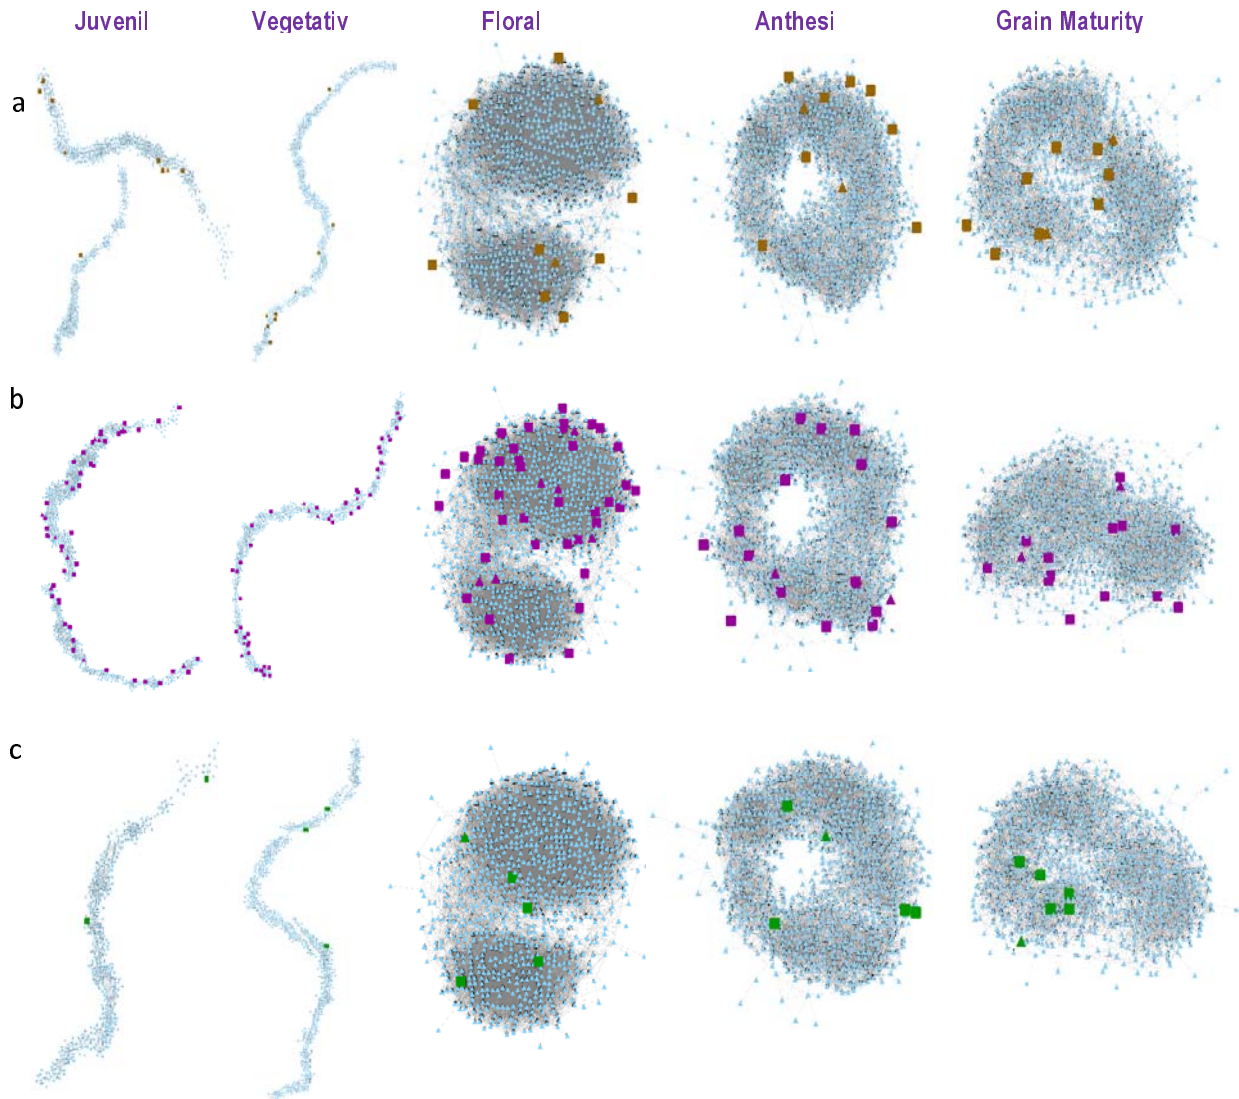

**Figure 5: Temporal gene regulatory network of a) AOSS, b) TSSE, c) TSSL genes through five developmental stages in BTx623 sorghum.** Edges with Pearson Correlation  $\geq 0.7$  and MR  $\geq 0.7$  is shown here.

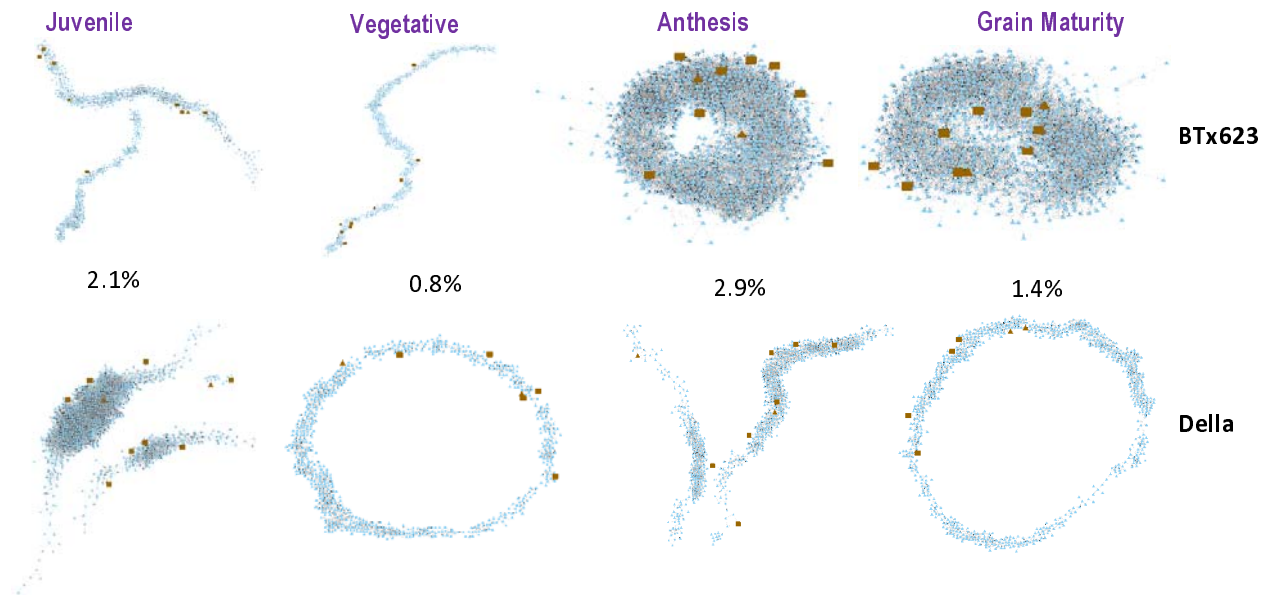

**Figure 6: Temporal gene regulatory network of AOSS genes through development in BTx623 and Della cultivars.** Edges with Pearson Correlation  $\geq 0.7$  and MR  $\geq 0.7$  is shown here. The percentage of shared regulatory edges are listed.

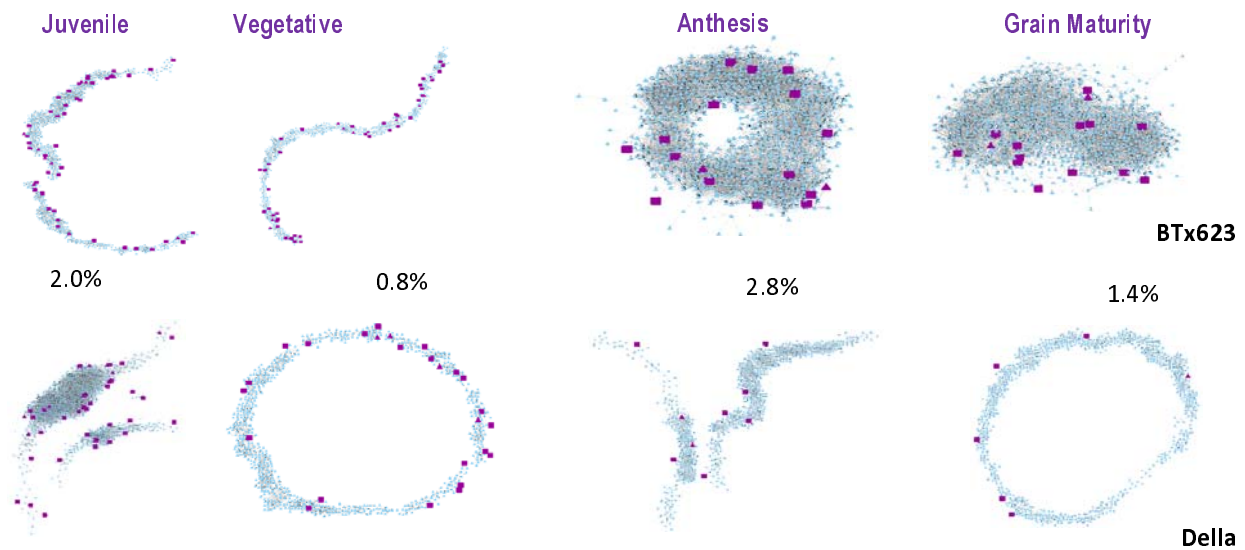

**Figure 7: Temporal gene regulatory network of TSSE genes through development in BTx623 and Della cultivars.** Edges with Pearson Correlation  $\geq 0.7$  and MR  $\geq 0.7$  is shown here. The percentage of shared regulatory edges are listed.

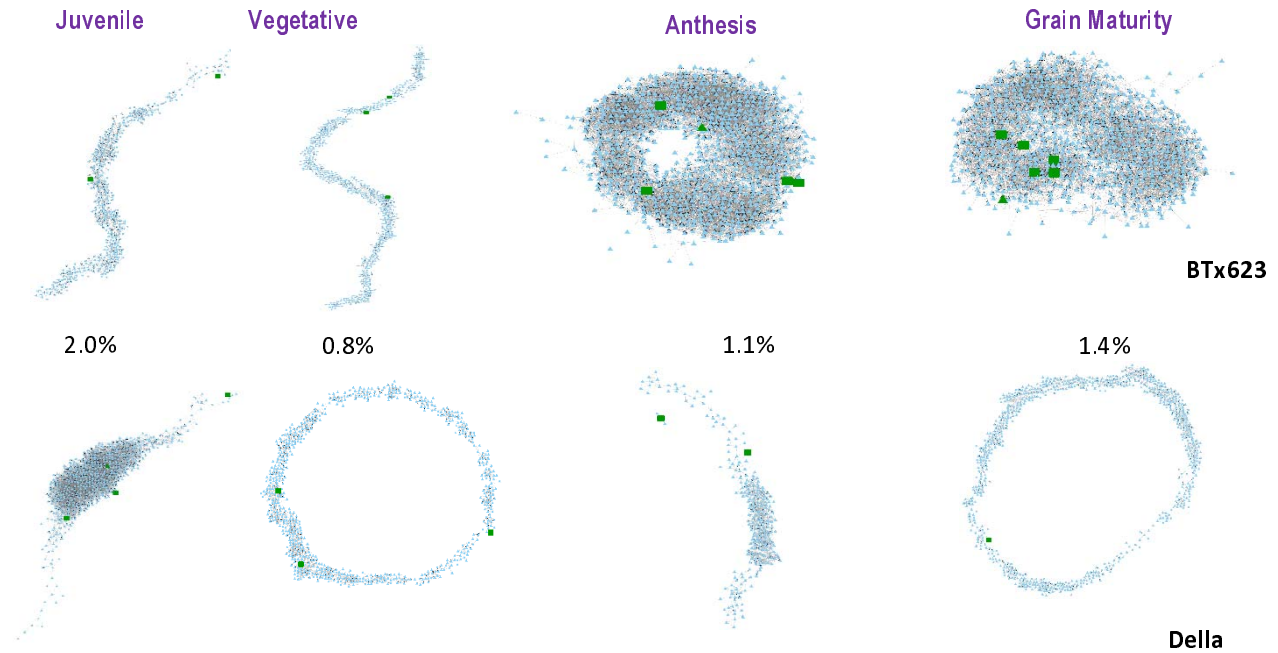

**Figure 8: Temporal gene regulatory network of TSSL genes through development in BTx623 and Della cultivars.** Edges with Pearson Correlation  $\geq 0.7$  and MR  $\geq 0.7$  is shown here. The percentage of shared regulatory edges are listed.

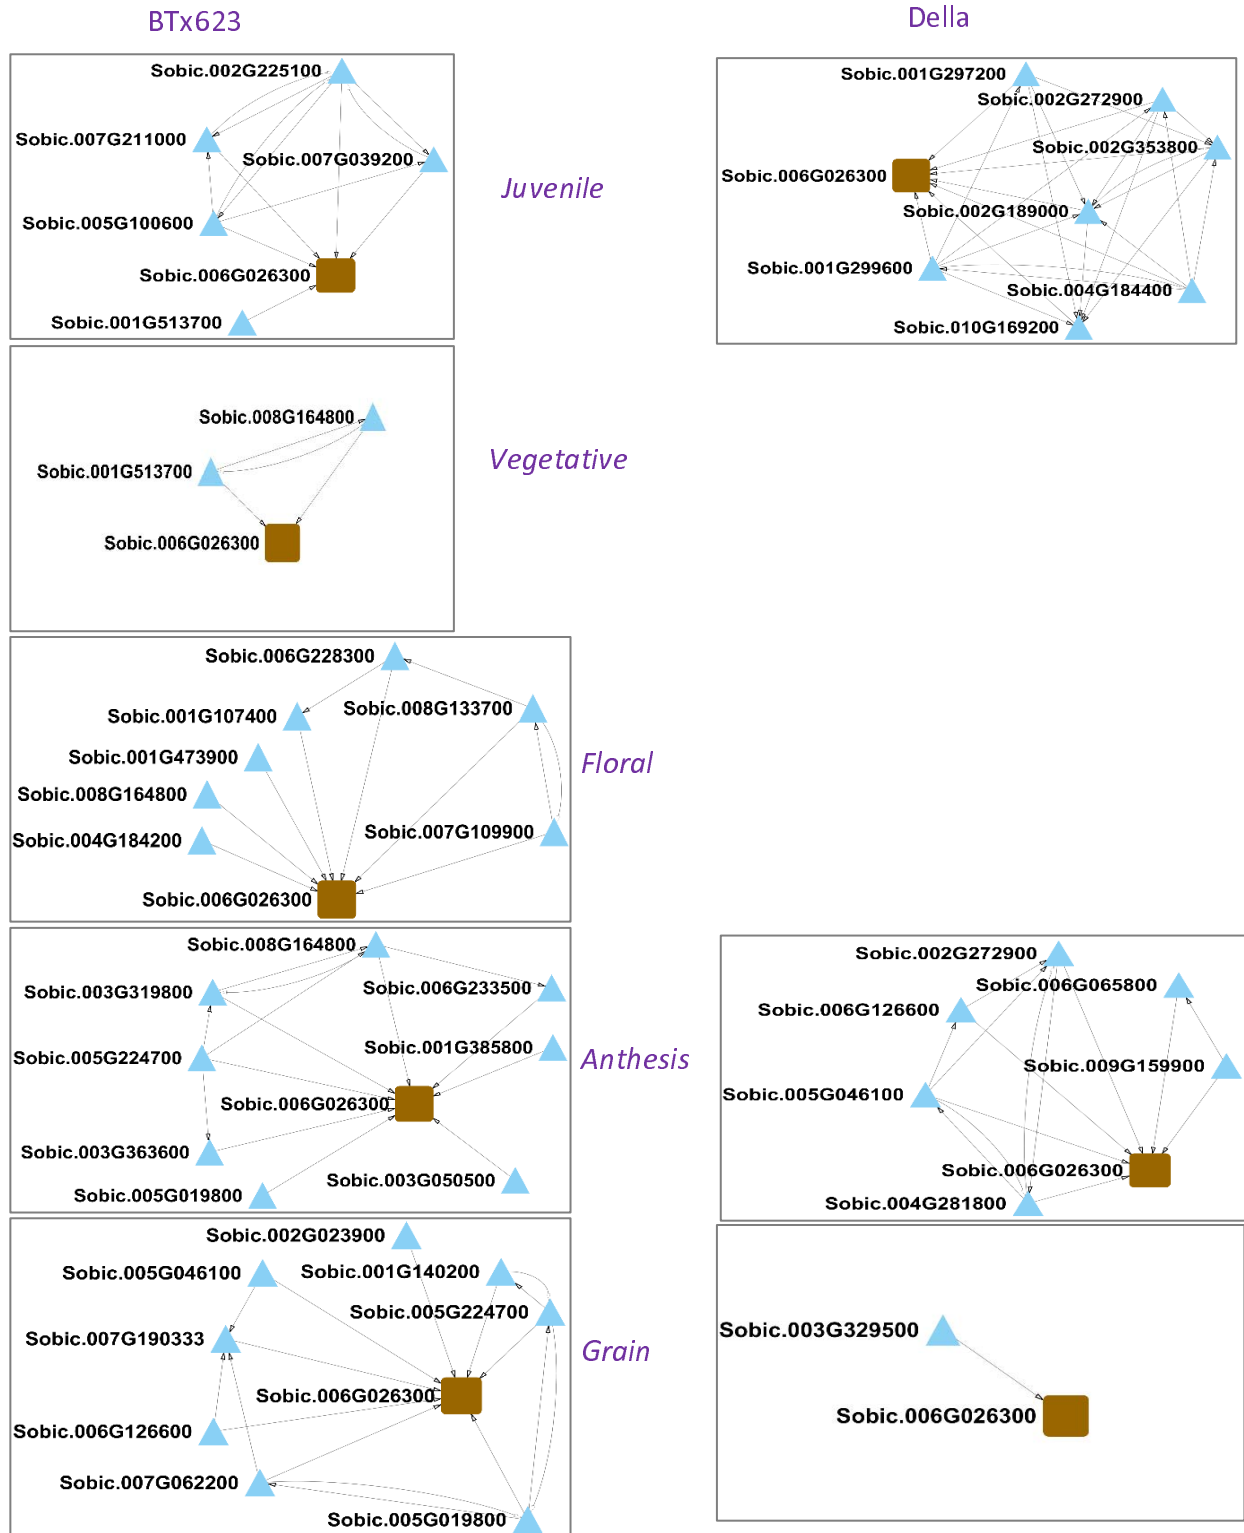

**Figure 9: Predicted gene regulatory networks of *Sobic.006G26300* (one of most stem-specific and highly expressed gene) for BTx623 and Della for comparable time points.**

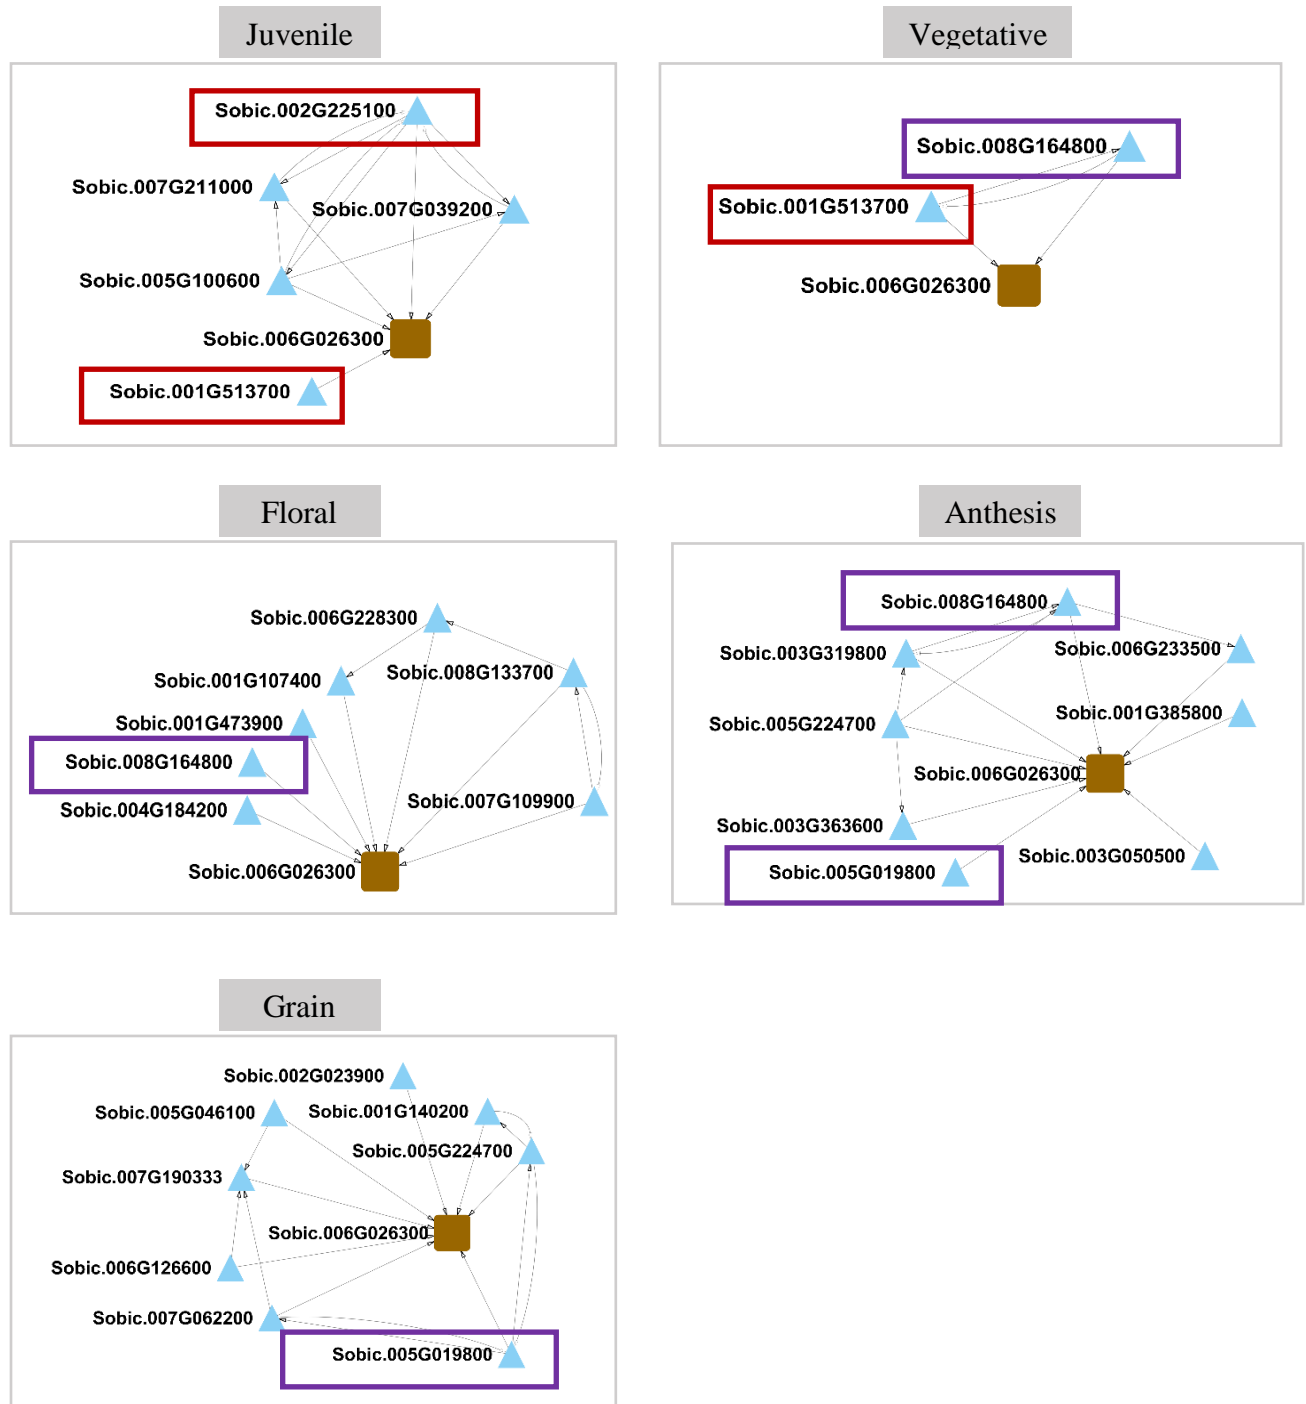

**Figure 10: Predicted regulatory TFs of Sobic.006G024800 during a) Early stage and b) Late stage. The regulatory interactions shown here are predicted at PCC & MR  $\geq$  0.9.**
